# Supplementary material for: Essential Oils Biofilm Modulation Activity and Machine Learning Analysis on Pseudomonas aeruginosa Isolates from Cystic Fibrosis Patients
Source: MDPI journal article supplement (doi:10.3390/microorganisms10050887), 2022-04-24

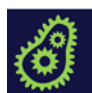

---

SUPPLEMENTARY MATERIAL

---

Essential oils biofilm modulation activity and machine learning analysis on *Pseudomonas aeruginosa* isolates from cystic fibrosis patients.

Marco Artini <sup>1,†</sup>, Rosanna Papa <sup>1,†</sup>, Filippo Sapienza <sup>2,3</sup>, Mijat Božović <sup>4</sup>, Gianluca Vrenna <sup>1</sup>, Vanessa Tuccio Guarna As-santi <sup>5</sup>, Manuela Sabatino <sup>2,3</sup>, Stefania Garzoli <sup>3</sup>, Ersilia Vita Fiscarelli <sup>5</sup>, Rino Ragno <sup>2,3,6,\*</sup> and Laura Selan <sup>1,\*</sup>

<sup>1</sup> Department of Public Health and Infectious Diseases, Sapienza University, p.le Aldo Moro 5, 00185 Rome, Italy. marco.artini@uniroma1.it, rosanna.papa@uniroma1.it, gianluca.vrenna@uniroma1.it, laura.selan@uniroma1.it

<sup>2</sup> Rome Center for Molecular Design, Department of Drug Chemistry and Technology, Sapienza University, p.le Aldo Moro 5, 00185 Rome, Italy. rino.ragno@uniroma1.it, [filippo.sapienza@uniroma1.it](mailto:filippo.sapienza@uniroma1.it), [manuela.sabatino@uniroma1.it](mailto:manuela.sabatino@uniroma1.it), stefania.garzoli@uniroma1.it

<sup>3</sup> Department of Drug Chemistry and Technology, Sapienza University, p.le Aldo Moro 5, 00185 Rome, Italy; rino.ragno@uniroma1.it, [filippo.sapienza@uniroma1.it](mailto:filippo.sapienza@uniroma1.it), manuela.sabatino@uniroma1.it

<sup>4</sup> Faculty of Natural Sciences and Mathematics, University of Montenegro, Džordža Vašingtona bb, 81000 Podgorica, Montenegro; mijatboz@ucg.ac.me

<sup>5</sup> Paediatric and Laboratory Department. Children's Hospital and Institute Research Bambino Gesù, Italy; evita.fiscarelli@opbg.net

<sup>6</sup> Società Italiana Ricerca Oli Essenziali, Viale Regina Elena, 299 00161 Roma. rino.ragno@uniroma1.it

**Table S1.** Qualitative descriptors used for the unsupervised Machine Learning clusterization of *P. aeruginosa* strains.

| Descriptor Name                     | Parameter                                                                           |
|-------------------------------------|-------------------------------------------------------------------------------------|
| Type of sample                      | Esp: sputum; AT: hypopharyngeal suction                                             |
| Type of strain                      | <i>P. aeruginosa</i> ; <i>P. aeruginosa</i> multi-drug resistant                    |
| Phenotype                           | wrinkled colony surface; mucoid colony; irregular colony edges;<br>smooth phenotype |
| Carbapenems Sensitivity             | Resistant, Susceptible or Intermediate                                              |
| Meropenem Sensitivity               | Resistant, Susceptible or Intermediate                                              |
| Imipenem Sensitivity                | Resistant, Susceptible or Intermediate                                              |
| Piperacillin/tazobactam Sensitivity | Resistant, Susceptible or Intermediate                                              |
| Aminoglycosides Sensitivity         | Resistant, Susceptible or Intermediate                                              |
| Quinolones Sensitivity              | Resistant, Susceptible or Intermediate                                              |
| Monobactam                          | Resistant, Susceptible or Intermediate                                              |
| Cephalosporins                      | Resistant, Susceptible or Intermediate                                              |
| Colistin                            | Resistant, Susceptible or Intermediate                                              |
| First Infection                     | Positive or negative                                                                |
| Early Infection                     | Positive or negative                                                                |
| Late Infection                      | Positive or negative                                                                |
| <i>S. aureus</i> co-infection       | Positive or negative                                                                |
| <i>cftr</i> gene mutation           | N1303K/3849+10kbC>T                                                                 |
|                                     | F508del/F508del                                                                     |
|                                     | W1282X/2789+5G->A                                                                   |
| Biofilm formation                   | F508del/E193K                                                                       |
|                                     | Strong, moderate or weak                                                            |

**Table S2.** Phenotypical and genotypical characterization of 6 representative strains of *P. aeruginosa*.

| <b>ID pt</b> | <b>21</b>               | <b>23</b>           | <b>24</b>             | <b>24</b>             | <b>28</b>         | <b>29</b>           |
|--------------|-------------------------|---------------------|-----------------------|-----------------------|-------------------|---------------------|
| <b>ID</b>    | 22P                     | 25P                 | 26P                   | 27P                   | 37P               | 39P                 |
| <b>SAM</b>   | ESP                     | AT                  | TF                    | AT                    | AT                | ESP                 |
| <b>date</b>  | 1/11/2017               | 9/3/2010            | 8/27/2008             | 1/31/2017             | 2/22/2017         | 1/25/2017           |
| <b>Str</b>   | PA MDR                  | PA                  | PA                    | PA                    | PA                | PA MDR              |
| <b>Ph</b>    | w                       | sm                  | i                     | sm                    | m                 | m                   |
| <b>CAR</b>   | R                       | S                   | S                     | S                     | MP S/ IP R        | R                   |
| <b>PTC</b>   | S                       | S                   | S                     | S                     | S                 | R                   |
| <b>AM</b>    | R                       | I                   | S                     | S                     | R                 | R                   |
| <b>QUIN</b>  | R                       | S                   | S                     | S                     | S                 | R                   |
| <b>MB</b>    | S                       | I                   | I                     | S                     | S                 | I                   |
| <b>CEF</b>   | R                       | S                   | S                     | S                     | R                 | R                   |
| <b>COL</b>   | S                       | S                   | S                     | S                     | S                 | S                   |
| <b>1St</b>   |                         | X                   | X                     |                       |                   |                     |
| <b>E</b>     |                         |                     |                       |                       |                   |                     |
| <b>L</b>     | X                       |                     |                       | X                     | X                 | X                   |
| <b>CSA</b>   |                         |                     |                       | X                     |                   |                     |
| <b>GEN</b>   | N1303K/<br>3849+10kbC>T | F508del/<br>F508del | W1282X/<br>2789+5G->A | W1282X/<br>2789+5G->A | F508del/<br>E193K | F508del/<br>F508del |

The 6 *P. aeruginosa* clinical isolates and their characterization by several properties. **ID pt**: patient identification; **ID**: strain code; **SAM**: Sample; **Date**: Date of collection; **Str**: Strain; **Ph**: Phenotype; **CAR**: Carbapenems; **MP**: Meropenem; **IP**: Imipenem; **PTC**: Piperacillin/tazobactam; **AM**: Aminoglycosides; **QUIN**: Quinolones; **MB**: Monobactam; **CEF**: Cephalosporins; **COL**: Colistin; **1 St**: *P. aeruginosa* first isolate; **E**: *P. aeruginosa* early isolate; **L**: *P. aeruginosa* late isolate; **CSA**: *S. aureus* co-infection; **Esp**: sputum; **AT**: hypopharyngeal suction; **PA**: *P. aeruginosa*; **PA MDR**: *P. aeruginosa* multi-drug resistant; **w**: wrinkled colony surface; **m**: mucoid colony; **i**: irregular colony edges; **sm**: smooth phenotype; **R**: Resistant; **S**: Susceptible; **I**: Intermediate; **X**: denotes positive for the feature; **GEN**: Genotype

**Table S3.** Essential oil IDs and associated EO names.

| EO ID | EO Name                | EO ID | EO Name                |
|-------|------------------------|-------|------------------------|
| EO1   | Chamomile Morocco      | EO32  | Birch                  |
| EO2   | Sage Sclarea           | EO33  | Fennel                 |
| EO3   | Salvia Officinalis     | EO34  | Cedar Fruit            |
| EO4   | Red Thyme              | EO35  | Lemon                  |
| EO5   | Tea Tree Oil           | EO36  | Roman Chamomile        |
| EO6   | Melissa Oiio Essential | EO37  | Savory                 |
| EO7   | Pinus Mugo             | EO38  | Rosemary               |
| EO8   | Geranium Bourbon       | EO39  | Ceylon Cinnamon Peel   |
| EO9   | Oregano                | EO40  | Eucaliptus Globulus    |
| EO10  | Ylang Ylang            | EO41  | Sweet Orange           |
| EO11  | Coriander              | EO42  | Niaouly                |
| EO12  | Lavandula Angustifolia | EO43  | Artemisia              |
| EO13  | Myrtle                 | EO44  | Cajeput                |
| EO14  | Garlic                 | EO45  | Black Pepper           |
| EO15  | Cardamom               | EO46  | White Thyme            |
| EO16  | Mandarin               | EO47  | Marjoram               |
| EO17  | Hyssop                 | EO48  | Cloves                 |
| EO18  | Grapefruit             | EO49  | Cypress                |
| EO19  | Cymbopogon             | EO50  | Nutmeg Natural         |
| EO20  | Pinus Sibirica         | EO51  | Peppermint             |
| EO21  | Camphor                | EO52  | Verbena officinalis    |
| EO22  | Cadè                   | EO53  | Basil                  |
| EO23  | Cedar Leaves           | EO54  | Cymbopogon martinii    |
| EO24  | Ginger                 | EO55  | Laurel                 |
| EO25  | Cumin                  | EO56  | Anise                  |
| EO26  | Patchouli              | EO57  | Incense                |
| EO27  | Bitter Orange          | EO58  | Mentha Suaveolens      |
| EO28  | Eucalyptus             | EO59  | Coridothymus Capitatus |
| EO29  | Pinus Silvester        | EO60  | Thymus Vulgaris        |
| EO30  | Bergamot               | EO61  | Origanum Hirtum        |
| EO31  | Juniper                |       |                        |

**Table S4.** List of sistematically DA settings varied during ML hyperparameters optimization

| Parameter      | Settings                     | Description                                                                                                                                                                                                                         |
|----------------|------------------------------|-------------------------------------------------------------------------------------------------------------------------------------------------------------------------------------------------------------------------------------|
| preprocess_fns | aug10, aug20, baug10, baug20 | This is the function tha apply the data augmentation<br>The numbers 10 or 20 indicates the times each component percentage is increased or decreased up to 15%. Baug and aug indicated whether the dataset will be balanced or not. |
| component_min  | 0, 2, 4, 6                   | This represent the number of least occurrences for EO's components to be maintained in the training set                                                                                                                             |
| pca            | 60 %, 80 %, 90 %, 100 %      | Amount of variance extracted with the PCA. 100% indicate tha the whole EOs' data matrix was used but trasformed to avoid the usage of correlate variables.                                                                          |

**Table S5.** List of hyperparameters setting used for the preliminary ML models' through random search optimization

| Algorithm | Parameters        | Settings                                   | #   | Total Combinations |
|-----------|-------------------|--------------------------------------------|-----|--------------------|
| RF        | class_weight      | list_weight                                | 17  | 136000             |
|           | n_estimators      | from 1 to 200, step 10                     | 20  |                    |
|           | max_depth         | from 1 to 200, step 10                     | 20  |                    |
|           | min_samples_leaf  | from 1 to 200, step 10                     | 20  |                    |
| GB        | n_estimators      | from 1 to 200, step 10                     | 20  | 8000               |
|           | max_depth         | from 1 to 200, step 10                     | 20  |                    |
|           | min_samples_leaf  | from 1 to 200, step 10                     | 20  |                    |
|           | class_weight      | list_weight                                | 17  |                    |
| LR        | C                 | from 0.001 to 100, incrementing 20%        | 100 | 25500              |
|           | penalty           | l1, l2, elasticnet                         | 3   |                    |
|           | solver            | newton-cg, lbfgs, liblinear, sag, saga     | 5   |                    |
|           | max_iter          | 10000                                      | 1   |                    |
| SV        | class_weight      | list_weight                                | 17  | 6800               |
|           | C                 | from 0.001 to 100, incrementing 20%        | 100 |                    |
|           | kernel            | linear, poly, rbf, sigmoid                 | 4   |                    |
|           | probability       | TRUE                                       | 1   |                    |
| DT        | class_weight      | list_weight                                | 17  | 17408              |
|           | criterion         | gini, entropy                              | 2   |                    |
|           | splitter          | best, random                               | 2   |                    |
|           | max_depth         | from 1 to 20, step 5                       | 4   |                    |
| KNN       | min_samples_split | from 1 to 20, step 5                       | 4   | 2304               |
|           | min_samples_leaf  | from 1 to 20, step 5                       | 4   |                    |
|           | max_features      | auto, sqrt, log2, None                     | 4   |                    |
|           | n_neighbors       | from 1 to 30, step 5                       | 6   |                    |
| KNN       | weights           | uniform, distance                          | 2   | 2304               |
|           | algorithm         | auto, ball_tree, kd_tree, brute            | 4   |                    |
|           | leaf_size         | from 1 to 30, step 5                       | 6   |                    |
|           | metric            | minkowski, euclidean, manhattan, chebyshev | 4   |                    |
| KNN       | metric_params     | None                                       | 1   | 2304               |
|           | p                 | 1, 2                                       | 2   |                    |

**Table S6.** List of weight for the class\_weight hyperparameters in Table SM 6. Data are presented as python dictionaries

| <b>Combination</b> | <b>Balancing for class A</b> | <b>Balancing for class B</b> | <b>Balancing %</b> |
|--------------------|------------------------------|------------------------------|--------------------|
| <b>1</b>           | {0:1.0, 1:1.0},              |                              | <b>0</b>           |
| <b>2</b>           | {0:1.0, 1:1.1},              | {0:1.1, 1:1.0},              | <b>10</b>          |
| <b>3</b>           | {0:1.0, 1:1.2},              | {0:1.2, 1:1.0},              | <b>20</b>          |
| <b>4</b>           | {0:1.0, 1:1.3},              | {0:1.3, 1:1.0},              | <b>30</b>          |
| <b>5</b>           | {0:1.0, 1:1.4},              | {0:1.4, 1:1.0},              | <b>40</b>          |
| <b>6</b>           | {0:1.0, 1:1.5},              | {0:1.5, 1:1.0},              | <b>50</b>          |
| <b>7</b>           | {0:1.0, 1:2.0},              | {0:2.0, 1:1.0},              | <b>100</b>         |
| <b>8</b>           | {0:1.0, 1:2.5},              | {0:2.5, 1:1.0},              | <b>150</b>         |
| <b>9</b>           | {0:1.0, 1:3.0},              | {0:3.0, 1:1.0}]              | <b>200</b>         |

**Table S7.** List of hyperparameters setting used for the models' refining through random search optimization

| Algorithm | Parameters        | Settings                                   | #   | Total Combinations |
|-----------|-------------------|--------------------------------------------|-----|--------------------|
| RF        | class_weight      | list_weight                                | 17  | 136000000          |
|           | n_estimators      | from 1 to 200, step 1                      | 200 |                    |
|           | max_depth         | from 1 to 200, step 1                      | 200 |                    |
|           | min_samples_leaf  | from 1 to 200, step 1                      | 200 |                    |
| GB        | n_estimators      | from 1 to 200, step 1                      | 200 | 8000000            |
|           | max_depth         | from 1 to 200, step 1                      | 200 |                    |
|           | min_samples_leaf  | from 1 to 200, step 1                      | 200 |                    |
|           | class_weight      | list_weight                                | 17  |                    |
| LR        | C                 | from 0.001 to 100, incrementing 20%        | 100 | 25500              |
|           | penalty           | l1, l2, elasticnet                         | 3   |                    |
|           | solver            | newton-cg, lbfgs, liblinear, sag, saga     | 5   |                    |
|           | max_iter          | 10000                                      | 1   |                    |
| SV        | class_weight      | list_weight                                | 17  | 6800               |
|           | C                 | from 0.001 to 100, incrementing 20%        | 100 |                    |
|           | kernel            | linear, poly, rbf, sigmoid                 | 4   |                    |
|           | probability       | True                                       | 1   |                    |
| DT        | class_weight      | list_weight                                | 17  | 2176000            |
|           | criterion         | gini, entropy                              | 2   |                    |
|           | splitter          | best, random                               | 2   |                    |
|           | max_depth         | from 1 to 20, step 1                       | 20  |                    |
| KNN       | min_samples_split | from 1 to 20, step 1                       | 20  | 57600              |
|           | min_samples_leaf  | from 1 to 20, step 1                       | 20  |                    |
|           | max_features      | auto, sqrt, log2, None                     | 4   |                    |
|           | n_neighbors       | from 1 to 30, step 1                       | 30  |                    |
| KNN       | weights           | uniform, distance                          | 2   | 57600              |
|           | algorithm         | auto, ball_tree, kd_tree, brute            | 4   |                    |
|           | leaf_size         | from 1 to 30, step 1                       | 30  |                    |
|           | metric            | minkowski, euclidean, manhattan, chebyshev | 4   |                    |
|           | metric_params     | None                                       | 1   |                    |
|           | p                 | 1, 2                                       | 2   |                    |



**Table S8.** Antimicrobial activity of EOs listed in Table SM1, on representative clinical and reference strains of *P. aeruginosa*.

| EOs ID | PaO1 | PA14 | 22P | 25P | 26P | 27P | 37P | 39P |
|--------|------|------|-----|-----|-----|-----|-----|-----|
| EO1    | I    | I    | I   | I   | I   | I   | I   | I   |
| EO2    | I    | I    | I   | I   | I   | I   | I   | I   |
| EO3    | I    | I    | A   | I   | I   | I   | A   | I   |
| EO4    | I    | I    | A   | I   | I   | I   | A   | I   |
| EO5    | I    | I    | I   | I   | I   | I   | I   | I   |
| EO6    | I    | I    | I   | I   | I   | I   | I   | I   |
| EO7    | I    | I    | I   | I   | I   | I   | I   | I   |
| EO8    | I    | I    | I   | I   | I   | I   | I   | I   |
| EO9    | I    | A    | A   | A   | A   | A   | A   | A   |
| EO10   | I    | I    | I   | I   | I   | I   | I   | I   |
| EO11   | I    | I    | I   | I   | I   | I   | I   | I   |
| EO12   | I    | I    | I   | I   | I   | I   | I   | I   |
| EO13   | I    | I    | I   | I   | I   | I   | I   | I   |
| EO14   | A    | A    | I   | A   | I   | A   | A   | A   |
| EO15   | I    | I    | I   | I   | I   | I   | I   | I   |
| EO16   | I    | I    | I   | I   | I   | I   | I   | I   |
| EO17   | I    | I    | I   | I   | I   | I   | I   | I   |
| EO18   | I    | I    | I   | I   | I   | I   | I   | I   |
| EO19   | I    | I    | I   | I   | I   | I   | I   | I   |
| EO20   | I    | I    | I   | I   | I   | I   | I   | I   |
| EO21   | I    | I    | I   | I   | I   | I   | I   | I   |
| EO22   | A    | A    | A   | A   | A   | A   | A   | A   |
| EO23   | I    | I    | I   | I   | I   | I   | I   | I   |
| EO24   | I    | I    | I   | I   | I   | I   | I   | I   |
| EO25   | I    | I    | I   | I   | I   | I   | I   | I   |
| EO26   | I    | I    | I   | I   | I   | I   | I   | I   |
| EO27   | I    | I    | I   | I   | I   | I   | I   | I   |
| EO28   | I    | I    | I   | I   | I   | I   | I   | I   |
| EO29   | I    | I    | I   | I   | I   | I   | I   | I   |
| EO30   | I    | I    | I   | I   | I   | I   | I   | I   |
| EO31   | I    | I    | I   | I   | I   | I   | I   | I   |
| EO32   | A    | A    | A   | A   | A   | A   | A   | A   |
| EO33   | I    | I    | I   | I   | I   | I   | I   | I   |
| EO34   | I    | I    | I   | I   | I   | I   | I   | I   |
| EO35   | I    | I    | I   | I   | I   | I   | I   | I   |
| EO36   | I    | I    | I   | I   | I   | I   | I   | I   |
| EO37   | I    | I    | A   | I   | I   | I   | A   | A   |
| EO38   | I    | I    | I   | I   | I   | I   | A   | I   |
| EO39   | A    | A    | A   | A   | A   | A   | A   | A   |
| EO40   | I    | I    | I   | I   | I   | I   | I   | I   |

---

|             |   |   |   |   |   |   |   |   |
|-------------|---|---|---|---|---|---|---|---|
| <b>EO41</b> | I | I | I | I | I | I | I | I |
| <b>EO42</b> | I | I | I | I | I | I | I | I |
| <b>EO43</b> | I | I | I | I | I | I | I | I |
| <b>EO44</b> | I | I | I | I | I | I | I | I |
| <b>EO45</b> | I | I | I | I | I | I | I | I |
| <b>EO46</b> | I | I | I | I | I | I | A | A |
| <b>EO47</b> | I | I | I | I | I | I | I | I |
| <b>EO48</b> | I | A | I | I | I | I | I | A |
| <b>EO49</b> | I | I | I | I | I | I | I | I |
| <b>EO50</b> | I | I | I | I | I | I | I | I |
| <b>EO51</b> | I | I | I | I | I | I | I | I |
| <b>EO52</b> | I | I | I | I | I | I | I | I |
| <b>EO53</b> | I | I | I | I | I | I | I | I |
| <b>EO54</b> | I | I | I | I | I | I | I | I |
| <b>EO55</b> | I | I | I | I | I | I | I | I |
| <b>EO56</b> | I | I | I | I | I | I | I | I |
| <b>EO57</b> | I | I | I | I | I | I | I | I |
| <b>EO58</b> | I | I | I | I | I | I | I | I |
| <b>EO59</b> | I | I | I | I | I | I | A | A |
| <b>EO60</b> | I | I | I | I | I | I | A | A |
| <b>EO61</b> | I | I | I | I | I | I | I | A |

---

I: Inactive; A: Antibacterial

**Table S9.** Compositions of the 61 essential oils used in the study

|                                      | EO1  |
|--------------------------------------|------|
| . $\tau$ -muurolol                   | 2.1  |
| artemisia alcohol                    | 1.3  |
| borneol                              | 1.2  |
| borneol, butyrate                    | 4.3  |
| $\beta$ -caryophyllene               | 1.0  |
| caryophyllene oxide                  | 1.3  |
| cis-3-pinanone                       | 0.3  |
| cis- $\beta$ -farnesene              | 5.2  |
| eucalyptol                           | 2.0  |
| germacrene d                         | 4.5  |
| isobornyl 3-methylbutanoate          | 3.1  |
| limonene                             | 6.7  |
| linalool                             | 0.3  |
| myrtenol                             | 0.4  |
| o-cymene                             | 0.2  |
| pinocarveol                          | 7.4  |
| sativene                             | 0.9  |
| spathulenol                          | 4.0  |
| terpinen-4-ol                        | 0.4  |
| trans-2,7-dimethyl-4,6-octadien-2-ol | 33.2 |
| yomogi alcohol                       | 1.3  |
| $\alpha$ -pinene                     | 14.4 |
| $\beta$ -myrcene                     | 1.4  |
| $\delta$ -cadinene                   | 0.5  |
| $\delta$ -elemene                    | 1.7  |
| $\tau$ -cadinol                      | 0.5  |

|                        | EO2  |
|------------------------|------|
| $\beta$ -caryophyllene | 2.0  |
| caryophyllene oxide    | 2.3  |
| cis-geraniol           | 1.7  |
| geranyl acetate        | 3.5  |
| linalool               | 19.9 |
| linalyl anthranilate   | 60.0 |
| nerol acetate          | 2.2  |
| trans-linalool oxide   | 2.1  |
| $\alpha$ -bergamotene  | 0.8  |
| $\alpha$ -copaene      | 0.6  |
| $\alpha$ -terpineol    | 3.8  |
| $\beta$ -bisabolene    | 0.7  |
| $\beta$ -myrcene       | 0.3  |

|                        | EO3  |
|------------------------|------|
| alcanfor               | 21.3 |
| borneol                | 4.6  |
| bornyl acetate         | 2.6  |
| camphene               | 3.5  |
| $\beta$ -caryophyllene | 6.8  |
| caryophyllene oxide    | 0.3  |
| chrysanthone           | 25.1 |
| eucalyptol             | 11.7 |
| humulene               | 7.5  |
| humulene epoxide 2     | 0.3  |
| limonene               | 1.3  |
| $\alpha$ -cymene       | 1.3  |
| terpinen-4-ol          | 0.6  |
| thujone                | 7.8  |
| viridiflorol           | 0.2  |
| $\alpha$ -pinene       | 3.0  |
| $\beta$ -pinene        | 1.4  |
| $\gamma$ -terpinene    | 0.5  |

|                        | EO4  |
|------------------------|------|
| borneol                | 1.5  |
| carvacrol              | 7.2  |
| $\beta$ -caryophyllene | 2.3  |
| caryophyllene oxide    | 0.6  |
| eucalyptol             | 0.3  |
| limonene               | 0.3  |
| linalool               | 5.2  |
| methyl thymyl ether    | 0.2  |
| p-cymene               | 10.5 |
| terpinen-4-ol          | 1.8  |
| thymol                 | 66.3 |
| $\alpha$ -citral       | 0.1  |
| $\alpha$ -pinene       | 0.4  |
| $\alpha$ -terpinene    | 0.4  |
| $\alpha$ -terpineol    | 0.2  |
| $\beta$ -myrcene       | 0.5  |
| $\gamma$ -terpinene    | 2.3  |

|                     | EO5  |
|---------------------|------|
| eucalyptol          | 14.9 |
| globulol            | 0.4  |
| limonene            | 2.0  |
| linalool, oxide     | 0.2  |
| longifolene         | 0.2  |
| o-cymene            | 3.5  |
| terpinen-4-ol       | 37.5 |
| terpinolene         | 1.7  |
| viridiflorene       | 1.1  |
| $\alpha$ -gurjunene | 0.2  |
| $\alpha$ -pinene    | 11.1 |
| $\alpha$ -terpinene | 4.6  |
| $\alpha$ -terpineol | 8.1  |
| $\beta$ -myrcene    | 0.2  |
| $\beta$ -pinene     | 2.5  |
| $\gamma$ -terpinene | 11.8 |

---

|                         | EO6  |
|-------------------------|------|
| 6-methyl-5-hepten-2-one | 0.3  |
| $\beta$ -caryophyllene  | 31.4 |
| caryophyllene oxide     | 5.5  |
| cis-geraniol            | 2.5  |
| citronellal             | 26.3 |
| eucalyptol              | 0.7  |
| humulene epoxide 2      | 0.9  |
| limonene                | 1.6  |
| linalool                | 0.8  |
| $\alpha$ -citral        | 28.2 |
| $\alpha$ -copaene       | 0.7  |
| $\gamma$ -cadinene      | 0.6  |
| $\delta$ -cadinene      | 0.5  |

|                        | EO7  |
|------------------------|------|
| 3-carene               | 10.8 |
| bornyl acetate         | 13.4 |
| calamenene             | 0.7  |
| carvone                | 0.3  |
| $\beta$ -caryophyllene | 21.4 |
| cis-verbenol           | 0.5  |
| crypton                | 3.7  |
| cumaldehyde            | 0.5  |
| humulene               | 1.2  |
| isopinocarveol         | 0.5  |
| limonene               | 10.9 |
| linalool               | 0.2  |
| o-cymene               | 2.1  |
| p-cymen-8-ol           | 0.8  |
| trans-2-carene-4-ol    | 0.6  |
| $\alpha$ -copaene      | 0.9  |
| $\alpha$ -muurolene    | 1.1  |
| $\alpha$ -pinene       | 12.5 |
| $\alpha$ -terpineol    | 0.4  |
| $\beta$ -cubebene      | 1.2  |
| $\beta$ -phellandrene  | 7.0  |
| $\beta$ -pinene        | 7.6  |
| $\delta$ -cadinene     | 1.6  |

|                                    | EO8  |
|------------------------------------|------|
| 1-indanone                         | 3.8  |
| 2,6-dimethyl-2,6-octadiene         | 0.6  |
| 2-pentadecanone, 6,10,14-trimethyl | 0.4  |
| acetic acid                        | 5.0  |
| cis-geraniol                       | 12.9 |
| citronellol                        | 26.3 |
| citronellyl butyrate               | 1.5  |
| citronellyl formate                | 8.0  |
| geraniol formate                   | 3.8  |
| geranyl isobutyrate                | 1.2  |
| geranyl propionate                 | 0.8  |
| heptanoic acid                     | 1.2  |
| hexanoic acid                      | 0.6  |
| isomenthone                        | 4.6  |
| limonene                           | 8.4  |
| linalool                           | 9.6  |
| linalyl anthranilate               | 6.8  |
| o-cymene                           | 1.3  |
| rose oxide                         | 0.9  |
| $\alpha$ -pinene                   | 0.5  |
| $\beta$ -myrcene                   | 0.4  |
| $\beta$ -pinene                    | 1.2  |

|                        | EO9  |
|------------------------|------|
| borneol                | 0.4  |
| carvacrol              | 76.5 |
| $\beta$ -caryophyllene | 6.7  |
| caryophyllene oxide    | 2.3  |
| eucalyptol             | 0.4  |
| limonene               | 0.5  |
| linalool               | 2.4  |
| p-cymene               | 6.8  |
| terpinen-4-ol          | 0.5  |
| $\alpha$ -pinene       | 0.4  |
| $\alpha$ -terpinene    | 0.3  |
| $\beta$ -myrcene       | 0.8  |
| $\gamma$ -terpinene    | 1.9  |



|                             | EO10 |
|-----------------------------|------|
| acetic acid, cinnamyl ester | 1.0  |
| calamenene                  | 0.3  |
| $\beta$ -caryophyllene      | 15.5 |
| cis-geraniol                | 1.5  |
| cis- $\beta$ -farnesene     | 13.9 |
| eucalyptol                  | 0.2  |
| eugenol                     | 0.6  |
| farnesol                    | 2.6  |
| farnesyl acetate            | 3.5  |
| geranyl acetate             | 12.2 |
| germacrene d                | 18.2 |
| humulene                    | 4.3  |
| linalool                    | 10.4 |
| methyl benzoate             | 2.1  |
| p-methylanisole             | 3.3  |
| $\alpha$ -cadinol           | 1.1  |
| $\alpha$ -copaene           | 1.2  |
| $\beta$ -elemene            | 0.5  |
| $\beta$ -ylangene           | 0.5  |
| $\gamma$ -cadinene          | 1.0  |
| $\gamma$ -muurolene         | 1.8  |
| $\delta$ -cadinene          | 3.8  |
| $\tau$ -cadinol             | 0.6  |

|                                       | EO11 |
|---------------------------------------|------|
| 3,7-octadiene-2,6-diol, 2,6-dimethyl- | 0.2  |
| benzyl benzoate                       | 6.4  |
| camphene                              | 0.4  |
| camphor                               | 5.7  |
| cis-geraniol                          | 1.7  |
| eucalyptol                            | 0.4  |
| geranyl acetate                       | 5.2  |
| limonene                              | 1.7  |
| linalool                              | 66.7 |
| o-cymene                              | 2.5  |
| salicylic acid, benzyl ester          | 2.2  |
| terpinen-4-ol                         | 0.2  |
| trans-linalool oxide                  | 0.6  |
| $\alpha$ -pinene                      | 3.4  |
| $\alpha$ -terpineol                   | 0.8  |
| $\beta$ -myrcene                      | 0.5  |
| $\beta$ -pinene                       | 0.3  |
| $\gamma$ -terpinene                   | 0.9  |

---

|                            | EO12 |
|----------------------------|------|
| 1-octen-3-ol               | 0.3  |
| 3-octanol                  | 0.3  |
| 3-octanone                 | 0.9  |
| borneol                    | 1.4  |
| butanoic acid, hexyl ester | 0.5  |
| $\beta$ -caryophyllene     | 2.7  |
| cis-geraniol               | 0.4  |
| cis- $\beta$ -farnesene    | 1.9  |
| cis- $\beta$ -ocimene      | 1.0  |
| eucalyptol                 | 2.4  |
| lavandulyl acetate         | 4.3  |
| limonene                   | 0.5  |
| linalool                   | 34.7 |
| linalyl acetate            | 41.4 |
| terpinen-4-ol              | 3.8  |
| $\alpha$ -pinene           | 0.2  |
| $\alpha$ -terpineol        | 1.3  |
| $\beta$ -myrcene           | 0.7  |
| $\beta$ -ocimene           | 1.3  |

|                             | EO13 |
|-----------------------------|------|
| 1,4-dihydroxy-p-menth-2-ene | 0.3  |
| 3-carene                    | 0.2  |
| $\beta$ -caryophyllene      | 2.2  |
| cis-geraniol                | 0.7  |
| eucalyptol                  | 40.8 |
| geranyl acetate             | 9.7  |
| humulene                    | 0.5  |
| isobutyl 2-methylbutyrate   | 0.5  |
| isobutyl isobutyrate        | 0.3  |
| limonene                    | 7.1  |
| linalool                    | 3.7  |
| linalyl anthranilate        | 1.2  |
| methyleugenol               | 2.0  |
| o-cymene                    | 5.3  |
| p-cymen-8-ol                | 0.7  |
| pinocarveol                 | 0.2  |
| terpinen-4-ol               | 0.6  |
| $\alpha$ -pinene            | 17.4 |
| $\alpha$ -terpineol         | 3.9  |
| $\alpha$ -terpineol acetate | 1.9  |
| $\beta$ -myrcene            | 0.2  |
| $\beta$ -pinene             | 0.2  |
| $\gamma$ -elemene           | 0.2  |

|                                     | EO14 |
|-------------------------------------|------|
| 1,2-dithiolane                      | 0.5  |
| 1,2-dithiolane, 1,1-dioxide         | 2.8  |
| 3-vinyl-1,2-dithiacyclohex-4-ene    | 2.6  |
| diallyl disulphide                  | 57.6 |
| diallyl sulfide                     | 3.8  |
| dimethyl trisulfide                 | 0.5  |
| disulfide, methyl 2-propenyl        | 2.7  |
| eucalyptol                          | 0.3  |
| limonene                            | 0.5  |
| trans-3,5-diethyl-1,2,4-trithiolane | 0.3  |
| trisulfide, di-2-propenyl           | 2.1  |
| trisulfide, methyl 2-propenyl       | 26.1 |

|                             | EO15 |
|-----------------------------|------|
| cis-geraniol                | 1.1  |
| cis- $\beta$ -terpineol     | 0.7  |
| eucalyptol                  | 34.7 |
| limonene                    | 2.0  |
| linalool                    | 5.0  |
| linalyl anthranilate        | 8.2  |
| nerolidol                   | 1.3  |
| o-cymene                    | 0.4  |
| sabinene                    | 0.3  |
| $\alpha$ -pinene            | 1.3  |
| $\alpha$ -terpineol         | 1.9  |
| $\alpha$ -terpineol acetate | 41.8 |
| $\beta$ -myrcene            | 1.1  |
| $\beta$ -pinene             | 0.3  |

|                     | EO16 |
|---------------------|------|
| limonene            | 66.7 |
| o-cymene            | 7.6  |
| sabinene            | 0.2  |
| terpinolene         | 0.9  |
| $\alpha$ -pinene    | 2.4  |
| $\alpha$ -terpineol | 0.3  |
| $\beta$ -myrcene    | 1.6  |
| $\beta$ -pinene     | 1.3  |
| $\gamma$ -terpinene | 19.0 |

|                         | EO17 |
|-------------------------|------|
| 4-methoxycinnamaldehyde | 1.1  |
| borneol                 | 1.1  |
| $\beta$ -caryophyllene  | 1.3  |
| caryophyllene oxide     | 0.6  |
| cis-3-pinanone          | 34.1 |
| dhs activator           | 0.6  |
| elemol                  | 1.1  |
| estragole               | 0.2  |
| eucalyptol              | 0.6  |
| limonene                | 1.4  |
| linalool                | 18.0 |
| myrtenal                | 0.5  |
| myrtenol                | 1.0  |
| o-cymene                | 0.5  |
| pinocarveol             | 0.3  |
| sabinene                | 0.6  |
| spathulenol             | 1.1  |
| terpinen-4-ol           | 0.9  |
| trans-pinocamphone      | 18.9 |
| $\alpha$ -pinene        | 8.6  |
| $\alpha$ -terpineol     | 0.8  |
| $\beta$ -myrcene        | 0.3  |
| $\beta$ -pinene         | 6.4  |

|                           | EO18 |
|---------------------------|------|
| p-mentha-2,8-dien-1-ol    | 1.9  |
| carveol                   | 1.9  |
| carvone                   | 4.7  |
| caryophyllene oxide       | 0.4  |
| cis-carveol               | 3.3  |
| cis-limonene oxide        | 3.5  |
| limonene                  | 78.2 |
| limonene-1,2-diol         | 0.7  |
| o-cymene                  | 0.3  |
| trans-limonene oxide      | 2.4  |
| trans-p-mentha-2,8-dienol | 2.1  |
| $\alpha$ -pinene          | 0.4  |
| $\beta$ -myrcene          | 0.3  |

|                        | EO19 |
|------------------------|------|
| $\alpha$ -muurolol     | 0.2  |
| $\beta$ -caryophyllene | 0.2  |
| citronellal            | 38.8 |
| citronellol            | 19.0 |
| citronellyl acetate    | 2.9  |
| elemol                 | 2.5  |
| eugenol                | 0.9  |
| geraniol               | 24.8 |
| germacrene D           | 0.7  |
| germacrene-D-4-ol      | 0.3  |
| isopulegol             | 0.7  |
| linalool               | 0.4  |
| $\alpha$ -cadinol      | 0.4  |
| $\alpha$ -citral       | 2.0  |
| $\beta$ -citral        | 1.2  |
| $\beta$ -elemene       | 0.9  |
| $\beta$ -myrcene       | 3.0  |
| $\gamma$ -muurolene    | 0.3  |
| $\delta$ -cadinene     | 0.9  |

|                        | EO20 |
|------------------------|------|
| borneol                | 2.7  |
| bornyl acetate         | 55.0 |
| camphene               | 18.1 |
| camphor                | 0.4  |
| $\beta$ -caryophyllene | 0.9  |
| caryophyllene oxide    | 1.3  |
| crypton                | 0.6  |
| humulene               | 0.5  |
| humulene epoxide 2     | 0.6  |
| limonene               | 3.9  |
| $\alpha$ -cymene       | 0.4  |
| p-cymen-7-ol           | 0.2  |
| p-cymen-8-ol           | 0.7  |
| santene                | 1.0  |
| tricyclene             | 1.5  |
| $\alpha$ -bisabolol    | 0.4  |
| $\alpha$ -pinene       | 8.4  |
| $\alpha$ -terpineol    | 0.4  |
| $\beta$ -bisabolene    | 0.2  |
| $\beta$ -phellandrene  | 1.1  |
| $\beta$ -pinene        | 1.6  |

|                             | EO21 |
|-----------------------------|------|
| 1,4-dihydroxy-p-menth-2-ene | 0.5  |
| camphene                    | 0.4  |
| estragole                   | 0.3  |
| eucalyptol                  | 57.0 |
| limonene                    | 22.8 |
| m-cymene                    | 13.4 |
| palmitic acid               | 1.6  |
| sabinene                    | 0.6  |
| $\alpha$ -pinene            | 0.4  |
| $\beta$ -pinene             | 3.1  |



|                                                              | EO22 |
|--------------------------------------------------------------|------|
| 2,2,7,7-tetramethyltricyclo[6.2.1.0~1,6~]undeca-3,5,9-triene | 2.4  |
| 2-methoxy-4-propylphenol                                     | 3.0  |
| 2-methoxy-phenol                                             | 4.2  |
| 2-methyl-phenol                                              | 1.3  |
| 3-methyl-1,2-cyclopentanedione                               | 1.2  |
| 4-ethyl-2-methoxyphenol                                      | 7.3  |
| 8,14-cedranoxide                                             | 0.3  |
| calamenene                                                   | 17.4 |
| $\beta$ -caryophyllene                                       | 1.0  |
| cedrene                                                      | 8.8  |
| cedrol                                                       | 0.5  |
| creosol                                                      | 9.3  |
| cubenol                                                      | 2.7  |
| humulene                                                     | 1.6  |
| isoeugenol                                                   | 1.9  |
| isodene                                                      | 3.7  |
| m-cresol                                                     | 1.4  |
| phenol                                                       | 1.0  |
| $\alpha$ -cadinol                                            | 0.5  |
| $\alpha$ -calacorene                                         | 6.3  |
| $\alpha$ -curcumene                                          | 1.1  |
| $\alpha$ -muurolene                                          | 4.6  |
| $\delta$ -cadinene                                           | 18.6 |

|                  | EO23 |
|------------------|------|
| bornyl acetate   | 0.6  |
| camphene         | 0.3  |
| camphor          | 3.8  |
| chrysanthone     | 88.5 |
| eucalyptol       | 0.3  |
| fenchone         | 2.7  |
| limonene         | 0.3  |
| sabinene         | 0.3  |
| terpinen-4-ol    | 0.7  |
| thujone          | 1.8  |
| $\alpha$ -pinene | 0.4  |
| $\beta$ -myrcene | 0.3  |

|                         | EO24 |
|-------------------------|------|
| 6-methyl-5-hepten-2-one | 0.6  |
| borneol                 | 1.1  |
| camphene                | 5.7  |
| cis-geraniol            | 0.4  |
| elemol                  | 0.5  |
| eucalyptol              | 7.0  |
| limonene                | 1.1  |
| linalool                | 0.3  |
| nerolidol               | 0.6  |
| zingiberene             | 29.9 |
| $\alpha$ -bergamotene   | 0.4  |
| $\alpha$ -copaene       | 0.6  |
| $\alpha$ -curcumene     | 31.6 |
| $\alpha$ -farnesene     | 4.3  |
| $\alpha$ -pinene        | 1.7  |
| $\alpha$ -terpineol     | 0.7  |
| $\beta$ -bisabolene     | 10.6 |
| $\beta$ -elemene        | 1.2  |
| $\beta$ -eudesmol       | 0.3  |
| $\beta$ -myrcene        | 0.6  |
| $\gamma$ -muurolene     | 0.7  |

|                         | EO25 |
|-------------------------|------|
| 2-careen-10-ol          | 28.1 |
| carotol                 | 1.3  |
| carvacrol               | 0.3  |
| $\beta$ -caryophyllene  | 0.7  |
| caryophyllene oxide     | 0.5  |
| cis- $\beta$ -farnesene | 0.9  |
| cumaldehyde             | 37.9 |
| limonene                | 0.3  |
| p-cymen-7-ol            | 0.5  |
| p-cymen-8-ol            | 0.2  |
| p-cymene                | 7.6  |
| sabinene                | 0.2  |
| $\alpha$ -phellandrene  | 1.0  |
| $\alpha$ -pinene        | 0.3  |
| $\beta$ -myrcene        | 0.4  |
| $\beta$ -phellandrene   | 0.3  |
| $\beta$ -pinene         | 5.6  |
| $\gamma$ -terpinene     | 13.9 |

|                        | EO26 |
|------------------------|------|
| $\beta$ -caryophyllene | 3.2  |
| caryophyllene oxide    | 0.6  |
| globulol               | 1.1  |
| ledene oxide-(I)       | 0.4  |
| patchouli alcohol      | 45.4 |
| seychellene            | 6.8  |
| $\alpha$ -guaiene      | 15.3 |
| $\alpha$ -panasinsene  | 0.3  |
| $\alpha$ -patchoulene  | 5.9  |
| $\beta$ -guaiene       | 19.0 |
| $\beta$ -patchoulene   | 2.1  |

|                     | EO27 |
|---------------------|------|
| decanal             | 0.3  |
| limonene            | 95.1 |
| linalool            | 0.4  |
| linalyl acetate     | 0.6  |
| sabinene            | 0.2  |
| $\alpha$ -pinene    | 0.5  |
| $\beta$ -pinene     | 2.7  |
| $\gamma$ -terpinene | 0.1  |

|                  | EO28 |
|------------------|------|
| carvone          | 0.3  |
| eucalyptol       | 83.9 |
| limonene         | 6.1  |
| p-cymene         | 8.1  |
| $\alpha$ -pinene | 1.1  |
| $\beta$ -myrcene | 0.3  |
| $\beta$ -pinene  | 0.2  |

|                        | EO29 |
|------------------------|------|
| 3-carene               | 16.6 |
| bornyl acetate         | 1.4  |
| camphene               | 0.9  |
| $\beta$ -caryophyllene | 16.7 |
| caryophyllene oxide    | 3.5  |
| cis-verbenol           | 0.2  |
| humulene               | 1.2  |
| humulene epoxide 2     | 0.3  |
| limonene               | 11.2 |
| longifolene            | 2.0  |
| myrtenol               | 0.2  |
| $\alpha$ -cymene       | 0.5  |
| p-cymen-8-ol           | 1.6  |
| pinocarveol            | 0.4  |
| terpinolene            | 2.0  |
| $\alpha$ -cubebene     | 0.5  |
| $\alpha$ -pinene       | 22.8 |
| $\alpha$ -terpineol    | 0.9  |
| $\beta$ -pinene        | 17.1 |

---

|                      | EO30 |
|----------------------|------|
| carvone              | 0.4  |
| cis-carveol          | 0.3  |
| limonene             | 26.1 |
| limonene oxide, cis- | 0.3  |
| linalool             | 13.8 |
| linalyl anthranilate | 45.3 |
| nerol acetate        | 0.7  |
| o-cymene             | 6.5  |
| sabinene             | 0.5  |
| $\alpha$ -pinene     | 0.7  |
| $\beta$ -bisabolene  | 0.2  |
| $\beta$ -myrcene     | 0.7  |
| $\beta$ -pinene      | 4.6  |

|                         | EO31 |
|-------------------------|------|
| (E)- $\beta$ -farnesene | 0.6  |
| 4-epi-cubebol           | 1.1  |
| $\beta$ -caryophyllene  | 13.7 |
| caryophyllene oxide     | 2.9  |
| humulene                | 3.6  |
| limonene                | 7.5  |
| o-cymene                | 3.0  |
| p-cymen-8-ol            | 0.6  |
| sabinene                | 5.9  |
| spathulenol             | 0.8  |
| terpinen-4-ol           | 6.3  |
| terpinolene             | 0.9  |
| trans-calamenene        | 0.9  |
| $\alpha$ -cadinol       | 0.4  |
| $\alpha$ -copaene       | 1.0  |
| $\alpha$ -cubebene      | 0.9  |
| $\alpha$ -muurolene     | 0.8  |
| $\alpha$ -pinene        | 27.1 |
| $\alpha$ -terpineol     | 0.6  |
| $\beta$ -elemene        | 3.6  |
| $\beta$ -myrcene        | 9.3  |
| $\beta$ -pinene         | 3.6  |
| $\gamma$ -elemene       | 2.0  |
| $\gamma$ -muurolene     | 1.5  |
| $\gamma$ -terpinene     | 1.0  |
| $\delta$ -cadinene      | 0.4  |

|                                                              | EO32 |
|--------------------------------------------------------------|------|
| 1,8-dimethylnaphthalene                                      | 4.6  |
| 2,2,7,7-tetramethyltricyclo[6.2.1.0~1,6~]undeca-3,5,9-triene | 1.7  |
| 2-methoxy-4-propylphenol                                     | 2.7  |
| 2-methoxy-phenol                                             | 6.6  |
| 2-methyl-phenol                                              | 1.2  |
| 3-methyl-1,2-cyclopentanedione                               | 0.8  |
| 4-epi-cubebol                                                | 2.8  |
| benzocycloheptatriene                                        | 0.9  |
| cadalene                                                     | 5.5  |
| cadina-1(2),4-diene                                          | 2.7  |
| calamenene                                                   | 18.1 |
| cedrene                                                      | 8.2  |
| creosol                                                      | 7.2  |
| dihydrocurcumene                                             | 3.4  |
| isoeugenol                                                   | 1.6  |
| m-cresol                                                     | 1.3  |
| $\alpha$ -cadinol                                            | 0.6  |
| $\alpha$ -calacorene                                         | 5.8  |
| $\alpha$ -muurolene                                          | 4.4  |
| $\beta$ -cadinene                                            | 0.7  |
| $\delta$ -cadinene                                           | 18.5 |
| $\delta$ -cadinol                                            | 0.8  |

|                       | EO33 |
|-----------------------|------|
| anethole              | 78.1 |
| camphor               | 0.2  |
| estragole             | 2.2  |
| fenchone              | 3.4  |
| limonene              | 3.4  |
| $\alpha$ -cymene      | 0.4  |
| p-acetonylanisole     | 4.7  |
| p-anisaldehyde        | 6.3  |
| $\alpha$ -bergamotene | 0.1  |
| $\alpha$ -pinene      | 1.0  |
| $\beta$ -myrcene      | 0.2  |

|                            | EO34 |
|----------------------------|------|
| carveol                    | 0.4  |
| carvone                    | 1.4  |
| $\beta$ -caryophyllene     | 0.2  |
| caryophyllene oxide        | 0.4  |
| cis-p-mentha-2,8-dien-1-ol | 0.4  |
| geranic acid               | 1.0  |
| limonene                   | 32.2 |
| limonene oxide, cis-       | 0.7  |
| limonene oxide, trans-     | 0.5  |
| linalool                   | 6.4  |
| linalyl anthranilate       | 25.0 |
| nerol acetate              | 1.6  |
| $\alpha$ -cymene           | 17.4 |
| sabinene                   | 0.2  |
| trans-p-mentha-2,8-dienol  | 0.4  |
| $\alpha$ -bergamotene      | 0.3  |
| $\alpha$ -citral           | 4.8  |
| $\alpha$ -pinene           | 0.4  |
| $\beta$ -bisabolene        | 0.5  |
| $\beta$ -citral            | 2.1  |
| $\beta$ -myrcene           | 0.4  |
| $\beta$ -pinene            | 3.2  |



|                            | EO35 |
|----------------------------|------|
| carveol                    | 0.3  |
| caryophyllene oxide        | 0.4  |
| cis-geraniol               | 2.2  |
| cis-p-mentha-2,8-dien-1-ol | 0.4  |
| geranic acid               | 1.6  |
| geranyl acetate            | 1.0  |
| limonene                   | 59.2 |
| limonene glycol            | 2.9  |
| limonene oxide, trans-     | 0.7  |
| myrtenal                   | 0.2  |
| nerol acetate              | 0.9  |
| o-cymene                   | 7.9  |
| sabinene                   | 1.0  |
| $\alpha$ -citral           | 7.8  |
| $\alpha$ -pinene           | 1.1  |
| $\beta$ -citral            | 3.3  |
| $\beta$ -myrcene           | 0.7  |
| $\beta$ -pinene            | 7.2  |
| $\gamma$ -terpinene        | 1.1  |

|                                      | EO36 |
|--------------------------------------|------|
| artemisia alcohol                    | 1.7  |
| borneol                              | 0.8  |
| borneol, butyrate                    | 1.7  |
| bornyl acetate                       | 1.0  |
| camphene                             | 0.4  |
| $\beta$ -caryophyllene               | 6.0  |
| caryophyllene oxide                  | 0.7  |
| cis-3-pinane                         | 0.3  |
| eucalyptol                           | 2.5  |
| germacrene d                         | 1.8  |
| limonene                             | 7.3  |
| o-cymene                             | 0.2  |
| pinocarveol                          | 4.8  |
| pinocarvone                          | 0.3  |
| sabinene                             | 0.4  |
| sativene                             | 0.7  |
| spathulenol                          | 1.3  |
| terpinen-4-ol                        | 0.3  |
| terpinolene                          | 0.2  |
| trans-2,7-dimethyl-4,6-octadien-2-ol | 49.3 |
| yomogi alcohol                       | 1.3  |
| $\alpha$ -pinene                     | 18.9 |
| $\beta$ -myrcene                     | 1.7  |
| $\delta$ -elemene                    | 1.5  |

|                        | EO37 |
|------------------------|------|
| 1-octen-3-ol           | 0.9  |
| borneol                | 1.0  |
| carvacrol              | 71.5 |
| carvacrol acetate      | 0.3  |
| $\beta$ -caryophyllene | 5.0  |
| caryophyllene oxide    | 1.0  |
| eucalyptol             | 0.4  |
| limonene               | 0.2  |
| linalool               | 1.5  |
| p-cymene               | 5.6  |
| spathulenol            | 0.3  |
| terpinen-4-ol          | 1.1  |
| thymol                 | 1.6  |
| $\alpha$ -pinene       | 0.3  |
| $\alpha$ -terpinene    | 0.5  |
| $\alpha$ -terpineol    | 0.2  |
| $\beta$ -bisabolene    | 4.1  |
| $\beta$ -myrcene       | 0.3  |
| $\gamma$ -cadinene     | 0.4  |
| $\gamma$ -muurolene    | 0.6  |
| $\gamma$ -terpinene    | 2.3  |
| $\delta$ -cadinene     | 0.8  |

|                        | EO38 |
|------------------------|------|
| borneol                | 1.3  |
| bornyl acetate         | 0.4  |
| camphene               | 0.8  |
| camphor                | 21.4 |
| $\beta$ -caryophyllene | 6.2  |
| eucalyptol             | 53.2 |
| eugenol                | 0.7  |
| limonene               | 1.7  |
| <i>o</i> -cymene       | 0.4  |
| terpinen-4-ol          | 0.4  |
| $\alpha$ -pinene       | 6.7  |
| $\alpha$ -terpineol    | 1.2  |
| $\beta$ -myrcene       | 0.3  |
| $\beta$ -pinene        | 5.3  |

|                             | EO39 |
|-----------------------------|------|
| 2-methoxycinnamaldehyde     | 0.2  |
| acetic acid, cinnamyl ester | 2.6  |
| acetyleugenol               | 1.3  |
| $\beta$ -caryophyllene      | 4.0  |
| caryophyllene oxide         | 0.2  |
| eugenol                     | 34.6 |
| humulene                    | 0.6  |
| limonene                    | 0.2  |
| linalool                    | 3.2  |
| <i>o</i> -cymene            | 0.7  |
| tetradecanal                | 0.5  |
| trans-3-phenyl-2-propenal   | 49.1 |
| $\alpha$ -copaene           | 0.5  |
| $\alpha$ -phellandrene      | 0.3  |
| $\alpha$ -pinene            | 0.2  |
| $\alpha$ -terpineol         | 0.3  |
| $\beta$ -isosafole          | 0.9  |
| $\beta$ -phellandrene       | 0.5  |

|                  | EO40 |
|------------------|------|
| carvone          | 0.5  |
| cis-carveol      | 0.2  |
| eucalyptol       | 85.9 |
| limonene         | 4.5  |
| o-cymene         | 8.3  |
| $\alpha$ -pinene | 0.6  |

|                            | EO41 |
|----------------------------|------|
| carvone                    | 0.8  |
| cis-carveol                | 0.5  |
| cis-p-mentha-2,8-dien-1-ol | 0.3  |
| limonene                   | 95.0 |
| linalool                   | 0.8  |
| sabinene                   | 0.2  |
| trans-p-mentha-2,8-dienol  | 0.3  |
| $\alpha$ -pinene           | 0.4  |
| $\beta$ -myrcene           | 1.7  |

|                             | EO42 |
|-----------------------------|------|
| $\beta$ -caryophyllene      | 1.8  |
| eucalyptol                  | 66.0 |
| ledol                       | 5.4  |
| limonene                    | 5.9  |
| linalool                    | 0.2  |
| o-cymene                    | 1.5  |
| terpinen-4-ol               | 0.9  |
| terpinolene                 | 0.4  |
| $\alpha$ -pinene            | 5.3  |
| $\alpha$ -terpineol         | 8.3  |
| $\alpha$ -terpineol acetate | 1.4  |
| $\beta$ -myrcene            | 0.7  |
| $\beta$ -pinene             | 1.5  |
| $\gamma$ -terpinene         | 0.8  |

|                     | EO43 |
|---------------------|------|
| artemisia alcohol   | 2.0  |
| borneol             | 0.9  |
| camphene            | 3.0  |
| camphor             | 27.0 |
| cumaldehyde         | 0.4  |
| eucalyptol          | 2.0  |
| germacrene D        | 0.3  |
| myrtenol            | 0.3  |
| o-cymene            | 1.2  |
| pinocarveol         | 0.7  |
| sabinene            | 0.9  |
| santolina triene    | 2.2  |
| terpinen-4-ol       | 2.5  |
| thujone             | 44.6 |
| yomogi alcohol      | 1.6  |
| $\alpha$ -pinene    | 0.2  |
| $\beta$ -thujone    | 9.9  |
| $\gamma$ -terpinene | 0.3  |

|                             | EO44 |
|-----------------------------|------|
| $\beta$ -caryophyllene      | 9.1  |
| cis- $\beta$ -terpineol     | 0.7  |
| eucalyptol                  | 52.7 |
| limonene                    | 3.6  |
| linalool                    | 2.2  |
| p-cymene                    | 18.4 |
| p-menth-3-en-1-ol           | 0.3  |
| terpinolene                 | 0.5  |
| $\alpha$ -pinene            | 1.5  |
| $\alpha$ -terpineol         | 7.6  |
| $\alpha$ -terpineol acetate | 1.2  |
| $\beta$ -myrcene            | 0.6  |
| $\beta$ -pinene             | 0.8  |
| $\gamma$ -terpinene         | 0.9  |

|                        | EO45 |
|------------------------|------|
| 3-carene               | 5.9  |
| calamenene             | 0.3  |
| $\beta$ -caryophyllene | 33.6 |
| caryophyllene oxide    | 9.7  |
| humulene               | 2.4  |
| humulene epoxide 2     | 0.5  |
| limonene               | 11.1 |
| linalool               | 0.6  |
| p-cymene               | 1.1  |
| sabinene               | 7.2  |
| spathulenol            | 0.4  |
| terpinen-4-ol          | 0.4  |
| $\alpha$ -bergamotene  | 0.1  |
| $\alpha$ -copaene      | 5.4  |
| $\alpha$ -muurolene    | 0.4  |
| $\alpha$ -pinene       | 6.9  |
| $\beta$ -bisabolene    | 2.0  |
| $\beta$ -cubebene      | 0.7  |
| $\beta$ -elemene       | 0.7  |
| $\beta$ -pinene        | 6.3  |
| $\beta$ -selinene      | 0.5  |
| $\gamma$ -muurolene    | 0.2  |
| $\delta$ -cadinene     | 0.9  |
| $\delta$ -elemene      | 2.7  |

|                         | EO46 |
|-------------------------|------|
| 1-octen-3-ol            | 0.5  |
| borneol                 | 2.2  |
| camphene                | 1.0  |
| camphor                 | 2.4  |
| carvacrol               | 6.6  |
| $\beta$ -caryophyllene  | 2.4  |
| caryophyllene oxide     | 0.7  |
| cis- $\beta$ -terpineol | 0.2  |
| eucalyptol              | 1.2  |
| limonene                | 0.5  |
| linalool                | 7.5  |
| methyl thymyl ether     | 0.4  |
| p-cymene                | 18.2 |
| terpinen-4-ol           | 3.0  |
| thymol                  | 44.4 |
| $\alpha$ -pinene        | 1.3  |
| $\alpha$ -terpinene     | 0.6  |
| $\alpha$ -terpineol     | 0.2  |
| $\beta$ -myrcene        | 1.1  |
| $\beta$ -pinene         | 0.3  |
| $\gamma$ -terpinene     | 5.2  |



|                             | EO47 |
|-----------------------------|------|
| 1,4-dihydroxy-p-menth-2-ene | 0.8  |
| $\beta$ -caryophyllene      | 0.6  |
| caryophyllene oxide         | 1.0  |
| cis-sabinene hydrate        | 2.9  |
| cis- $\beta$ -terpineol     | 15.4 |
| eucalyptol                  | 1.0  |
| limonene                    | 0.8  |
| linalol oxide               | 0.5  |
| linalool                    | 40.7 |
| <i>o</i> -cymene            | 8.5  |
| <i>p</i> -cymen-8-ol        | 0.6  |
| sabinene                    | 2.6  |
| terpinen-4-ol               | 23.2 |
| $\alpha$ -pinene            | 0.4  |
| $\alpha$ -terpineol         | 0.4  |
| $\beta$ -myrcene            | 0.5  |

|                        | EO48 |
|------------------------|------|
| acetyleneugenol        | 9.9  |
| $\beta$ -caryophyllene | 8.8  |
| eugenol                | 80.1 |
| humulene               | 1.0  |
| methylsalicylate       | 0.2  |

---

|                             | EO49 |
|-----------------------------|------|
| 3-carene                    | 29.3 |
| camphene                    | 0.6  |
| cedrene                     | 0.5  |
| cedrol                      | 4.7  |
| cis-verbenol                | 0.3  |
| eucalyptol                  | 0.5  |
| limonene                    | 4.0  |
| linalool                    | 0.7  |
| o-cymene                    | 1.4  |
| p-cymen-8-ol                | 1.2  |
| sabinene                    | 0.7  |
| terpinen-4-ol               | 1.5  |
| terpinolene                 | 0.7  |
| trans-2-carene-4-ol         | 0.4  |
| verbenone                   | 0.3  |
| $\alpha$ -pinene            | 47.7 |
| $\alpha$ -terpineol         | 0.4  |
| $\alpha$ -terpineol acetate | 3.8  |
| $\beta$ -pinene             | 1.3  |

|                             | EO50 |
|-----------------------------|------|
| eucalyptol                  | 2.9  |
| eugenol                     | 2.2  |
| geranyl acetate             | 0.2  |
| isoeugenol                  | 0.3  |
| limonene                    | 7.8  |
| linalool                    | 0.5  |
| methyleugenol               | 0.3  |
| myristicin                  | 21.9 |
| o-cymene                    | 1.6  |
| sabinene                    | 13.9 |
| terpinen-4-ol               | 16.6 |
| terpinolene                 | 0.7  |
| $\alpha$ -copaene           | 0.3  |
| $\alpha$ -phellandrene      | 0.8  |
| $\alpha$ -pinene            | 12.0 |
| $\alpha$ -terpinene         | 0.6  |
| $\alpha$ -terpineol         | 0.7  |
| $\alpha$ -terpineol acetate | 0.1  |
| $\beta$ -isosafole          | 1.5  |
| $\beta$ -pinene             | 11.1 |
| $\gamma$ -terpinene         | 3.8  |

|                        | EO51 |
|------------------------|------|
| $\beta$ -caryophyllene | 0.2  |
| eucalyptol             | 0.9  |
| isomenthone            | 10.0 |
| isopulegol             | 0.9  |
| levomenthol            | 0.4  |
| limonene               | 0.5  |
| menthol                | 57.4 |
| menthol, acetate       | 5.0  |
| menthone               | 23.2 |
| piperitenone           | 0.7  |
| pulegone               | 0.4  |
| $\alpha$ -terpineol    | 0.3  |

|                         | EO52 |
|-------------------------|------|
| 6-methyl-5-hepten-2-one | 1.3  |
| $\beta$ -caryophyllene  | 0.7  |
| cis-geraniol            | 0.6  |
| cis-verbenol            | 0.3  |
| citronellal             | 8.0  |
| citronellyl formate     | 1.1  |
| elemol                  | 0.5  |
| eucalyptol              | 0.6  |
| geranic acid            | 0.7  |
| geraniol                | 5.6  |
| limonene                | 9.5  |
| linalool                | 1.3  |
| sabinene                | 0.5  |
| terpinen-4-ol           | 0.2  |
| $\alpha$ -citral        | 33.7 |
| $\alpha$ -copaene       | 0.1  |
| $\alpha$ -pinene        | 1.6  |
| $\beta$ -citral         | 30.9 |
| $\beta$ -myrcene        | 0.4  |
| $\beta$ -pinene         | 2.1  |
| $\delta$ -cadinene      | 0.2  |

|                           | EO53 |
|---------------------------|------|
| $\beta$ -caryophyllene    | 0.3  |
| caryophyllene oxide       | 0.3  |
| cis- $\alpha$ -bisabolene | 2.1  |
| cis- $\beta$ -farnesene   | 0.3  |
| estragole                 | 75.2 |
| levomenthol               | 0.4  |
| linalool                  | 19.7 |
| $\alpha$ -bergamotene     | 0.9  |
| $\alpha$ -citral          | 0.7  |

|                        | EO54 |
|------------------------|------|
| carvone                | 0.6  |
| $\beta$ -caryophyllene | 1.8  |
| cis-geraniol           | 76.5 |
| cis- $\beta$ -ocimene  | 0.3  |
| farnesol               | 0.7  |
| geranyl acetate        | 13.0 |
| humulene               | 0.2  |
| linalool               | 4.1  |
| nerol acetate          | 1.0  |
| $\alpha$ -citral       | 0.7  |
| $\beta$ -ocimene       | 1.1  |

|                             | EO55 |
|-----------------------------|------|
| eucalyptol                  | 53.9 |
| eugenol                     | 1.9  |
| limonene                    | 2.0  |
| linalool                    | 3.0  |
| methyleugenol               | 4.2  |
| myrtenol                    | 0.3  |
| o-cymene                    | 2.4  |
| sabinene                    | 3.2  |
| terpinen-4-ol               | 3.0  |
| $\alpha$ -pinene            | 3.2  |
| $\alpha$ -terpineol acetate | 18.8 |
| $\beta$ -pinene             | 2.3  |
| $\gamma$ -terpinene         | 1.8  |

---

|                        | EO56 |
|------------------------|------|
| anethole               | 88.5 |
| $\beta$ -caryophyllene | 0.4  |
| estragole              | 3.8  |
| isohomogenol           | 0.2  |
| limonene               | 1.6  |
| linalool               | 0.9  |
| nerolidol              | 0.3  |
| p-acetonylanisole      | 0.9  |
| p-anisaldehyde         | 2.1  |
| terpinen-4-ol          | 0.3  |
| $\alpha$ -bergamotene  | 0.5  |
| $\alpha$ -pinene       | 0.3  |
| $\alpha$ -terpineol    | 0.2  |

|                        | EO57 |
|------------------------|------|
| 3-carene               | 0.5  |
| 4-epi-cubebol          | 1.7  |
| acetic acid            | 0.7  |
| bornyl acetate         | 1.0  |
| $\beta$ -caryophyllene | 9.1  |
| caryophyllene oxide    | 3.0  |
| cis-verbenol           | 1.8  |
| humulene               | 2.0  |
| humulene epoxide 2     | 1.1  |
| limonene               | 20.3 |
| myrtenyl acetate       | 0.3  |
| $\alpha$ -cymene       | 3.7  |
| p-cymen-8-ol           | 0.2  |
| pinocarveol            | 0.9  |
| sabinene               | 2.8  |
| terpinen-4-ol          | 0.6  |
| viridiflorol           | 0.5  |
| $\alpha$ -copaene      | 2.3  |
| $\alpha$ -cubebene     | 0.4  |
| $\alpha$ -muurolene    | 0.4  |
| $\alpha$ -phellandrene | 2.0  |
| $\alpha$ -pinene       | 27.0 |
| $\alpha$ -selinene     | 1.1  |
| $\alpha$ -terpineol    | 0.5  |
| $\beta$ -elemene       | 4.0  |
| $\beta$ -eudesmol      | 0.3  |
| $\beta$ -myrcene       | 3.0  |
| $\beta$ -phellandrene  | 1.0  |
| $\beta$ -pinene        | 1.0  |
| $\beta$ -selinene      | 1.6  |
| $\gamma$ -eudesmol     | 0.5  |
| $\delta$ -cadinene     | 2.1  |
| $\tau$ -cadinol        | 2.3  |

|                                        | EO58 |
|----------------------------------------|------|
| . $\tau$ -muurolol                     | 0.1  |
| calamenene                             | 0.7  |
| $\beta$ -caryophyllene                 | 7.3  |
| caryophyllene oxide                    | 0.2  |
| cinerolon                              | 4.6  |
| cubenol                                | 0.2  |
| cyclohexanone, 2-(1-methylethylidene)- | 1.0  |
| epi-bicyclosesquiphellandrene          | 0.9  |
| germacrene D                           | 5.2  |
| humulene                               | 1.1  |
| jasmone                                | 0.6  |
| limonene                               | 8.8  |
| myrtenal                               | 0.3  |
| pulegone                               | 59.8 |
| sabinene                               | 0.6  |
| terpinen-4-ol                          | 0.7  |
| thymol                                 | 1.2  |
| $\alpha$ -cadinol                      | 0.2  |
| $\alpha$ -cubebene                     | 0.5  |
| $\alpha$ -gurjunene                    | 0.4  |
| $\alpha$ -muurolene                    | 0.2  |
| $\alpha$ -pinene                       | 1.0  |
| $\beta$ -ocimene                       | 0.1  |
| $\beta$ -pinene                        | 3.8  |
| $\gamma$ -cadinene                     | 0.2  |
| $\gamma$ -terpinene                    | 0.1  |



---

|                         | EO59 |
|-------------------------|------|
| 1-octen-3-ol            | 0.7  |
| borneol                 | 0.6  |
| carvacrol               | 61.0 |
| $\beta$ -caryophyllene  | 13.6 |
| caryophyllene oxide     | 1.4  |
| cis- $\beta$ -terpineol | 0.2  |
| humulene                | 0.6  |
| limonene                | 0.3  |
| linalool                | 1.8  |
| p-cymene                | 7.1  |
| thymol                  | 0.5  |
| $\alpha$ -citral        | 0.2  |
| $\alpha$ -terpinene     | 1.5  |
| $\alpha$ -thujene       | 1.0  |
| $\beta$ -bisabolene     | 1.6  |
| $\beta$ -myrcene        | 1.6  |
| $\beta$ -phellandrene   | 0.3  |
| $\gamma$ -terpinene     | 6.0  |

---

|                        | EO60 |
|------------------------|------|
| 1-octen-3-ol           | 0.6  |
| borneol                | 2.5  |
| camphene               | 0.6  |
| carvacrol              | 0.7  |
| $\beta$ -caryophyllene | 3.4  |
| caryophyllene oxide    | 1.8  |
| eucalyptol             | 0.9  |
| isothymol methyl ether | 6.0  |
| limonene               | 0.4  |
| linalool               | 3.7  |
| methyl thymyl ether    | 10.7 |
| p-cymene               | 30.5 |
| thymol                 | 34.1 |
| $\alpha$ -pinene       | 0.9  |
| $\alpha$ -terpineol    | 0.3  |
| $\beta$ -myrcene       | 1.0  |
| $\gamma$ -muurolene    | 0.3  |
| $\gamma$ -terpinene    | 1.8  |

|                        | EO61 |
|------------------------|------|
| 1-octen-3-ol           | 0.5  |
| alcanfor               | 0.3  |
| borneol                | 0.3  |
| carvacrol              | 0.8  |
| $\beta$ -caryophyllene | 2.9  |
| caryophyllene oxide    | 0.6  |
| eucalyptol             | 0.5  |
| humulene               | 0.3  |
| isothymol methyl ether | 7.4  |
| limonene               | 0.4  |
| methyl thymyl ether    | 4.9  |
| p-cymen-8-ol           | 0.1  |
| p-cymene               | 18.5 |
| thymol                 | 34.7 |
| thymol acetate         | 0.3  |
| $\alpha$ -muurolene    | 0.2  |
| $\alpha$ -phellandrene | 0.2  |
| $\alpha$ -terpineol    | 0.2  |
| $\alpha$ -thujene      | 1.1  |
| $\beta$ -bisabolene    | 5.0  |
| $\beta$ -bourbonene    | 0.4  |
| $\beta$ -myrcene       | 1.3  |
| $\gamma$ -cadinene     | 0.4  |
| $\gamma$ -muurolene    | 0.6  |
| $\gamma$ -terpinene    | 17.1 |
| $\delta$ -cadinene     | 0.7  |

**Table S10.** Preliminary models developed with the procedure described in reference [5].

| Threshold | Strain | ML Method | MCC <sub>cv</sub> |
|-----------|--------|-----------|-------------------|
| 40        | 39P    | svm       | 0.485             |
| 40        | 39P    | lr        | 0.426             |
| 120       | 27P    | dt        | 0.485             |
| 120       | 39P    | rf        | 0.429             |
| 120       | 39P    | svm       | 0.612             |
| 120       | 39P    | svm       | 0.612             |
| 120       | 39P    | svm       | 0.477             |
| 120       | 39P    | lr        | 0.492             |
| 120       | 39P    | knn       | 0.477             |

**Table S11.** Preliminary models developed for threshols at 80% and 100% biofilm modulation [5].

| Threshold | Strain | ML Method | MCC <sub>cv</sub> |
|-----------|--------|-----------|-------------------|
| 80        | PaO1   | dt        | 0.408             |
| 80        | 39P    | rf        | 0.426             |
| 80        | 39P    | rf        | 0.418             |
| 80        | 39P    | gb        | 0.566             |
| 80        | 39P    | gb        | 0.418             |
| 80        | 39P    | lr        | 0.473             |
| 80        | 39P    | lr        | 0.473             |
| 80        | 39P    | lr        | 0.443             |
| 80        | 39P    | lr        | 0.41              |
| 80        | 39P    | dt        | 0.426             |
| 80        | 39P    | knn       | 0.497             |
| 100       | 39P    | svm       | 0.405             |
| 100       | 39P    | dt        | 0.539             |
| 100       | 39P    | knn       | 0.585             |

**Table S12.** Number of model evaluated during the ML optimization process. NA means no model were developed for the strain/threshold combination due to to low number of active or inactive samples.

| Type   | Iters | T   | PA14  | PaO1  | 22P   | 25P   | 26P   | 27P   | 37P   | 39P   | Sum    | 3 Best for each |
|--------|-------|-----|-------|-------|-------|-------|-------|-------|-------|-------|--------|-----------------|
| Coarse | 10    | 40  | 2880  | NA    | 2880  | 2880  | NA    | 2880  | 2880  | 2880  | 17280  | 17298           |
| Finer  | 100   |     | 16000 | NA    | 8000  | 16000 | NA    | 16000 | 24000 | 8000  | 88000  | 88018           |
| Extra  | 1000  |     | 1000  | NA    | 1000  | 1000  | NA    | 1000  | 1000  | 1000  | 6000   | 6018            |
| Final  | 10000 |     | 10000 | NA    | 10000 | 10000 | NA    | 10000 | 10000 | 10000 | 60000  | 60018           |
| Coarse | 10    | 120 | NA    | 2880  | NA    | 2880  | 2880  | 2880  | NA    | 2880  | 14400  | 14415           |
| Finer  | 100   |     | NA    | 8000  | NA    | 16000 | 24000 | 16000 | NA    | 16000 | 80000  | 80015           |
| Extra  | 1000  |     | NA    | 1000  | NA    | 1000  | 1000  | 1000  | NA    | 1000  | 5000   | 5015            |
| Final  | 10000 |     | NA    | 10000 | NA    | 10000 | 10000 | 10000 | NA    | 10000 | 50000  | 50015           |
|        | Sum   |     | 29880 | 21880 | 21880 | 59760 | 37880 | 59760 | 37880 | 51760 | 320680 | 320812          |

**Table S13.** Preliminary models P1-P33 obtained with the combination of DA and random search hyperparameter optimization.

| # Model    | threshold | strain | MCC  |      | ACC  |      | ML<br>Method | comp min | Preprocess |     |
|------------|-----------|--------|------|------|------|------|--------------|----------|------------|-----|
|            |           |        | cv   | fit  | cv   | fit  |              |          | function   | pc  |
| <b>P1</b>  | 40        | PA14   | 0.46 | 1.00 | 0.87 | 1.00 | gb           | 2        | baug20     | 0.6 |
| <b>P2</b>  |           | PA14   | 0.44 | 0.65 | 0.83 | 0.89 | rf           | 0        | baug20     | 0.8 |
| <b>P3</b>  |           | PA14   | 0.41 | 1.00 | 0.87 | 1.00 | dt           | 2        | baug10     | 0.8 |
| <b>P4</b>  |           | 22P    | 0.47 | 0.47 | 0.78 | 0.78 | dt           | 0        | aug20      | 0   |
| <b>P5</b>  |           | 22P    | 0.47 | 0.47 | 0.78 | 0.78 | dt           | 0        | aug20      | 0   |
| <b>P6</b>  |           | 22P    | 0.47 | 0.47 | 0.78 | 0.78 | dt           | 0        | baug20     | 0   |
| <b>P7</b>  |           | 25P    | 0.39 | 0.96 | 0.79 | 0.98 | dt           | 2        | baug10     | 0.8 |
| <b>P8</b>  |           | 25P    | 0.36 | 0.88 | 0.71 | 0.95 | gb           | 6        | baug10     | 0.6 |
| <b>P9</b>  |           | 25P    | 0.34 | 1.00 | 0.75 | 1.00 | gb           | 2        | aug20      | 0.8 |
| <b>P10</b> |           | 27P    | 0.57 | 0.93 | 0.89 | 0.98 | gb           | 6        | aug10      | 0.6 |
| <b>P11</b> |           | 27P    | 0.55 | 1.00 | 0.89 | 1.00 | rf           | 6        | aug10      | 0.6 |
| <b>P12</b> |           | 27P    | 0.55 | 1.00 | 0.89 | 1.00 | gb           | 6        | aug10      | 0.8 |
| <b>P13</b> |           | 37P    | 0.48 | 0.78 | 0.78 | 0.90 | rf           | 0        | baug20     | 0.8 |
| <b>P14</b> |           | 37P    | 0.43 | 0.60 | 0.78 | 0.84 | knn          | 6        | aug10      | 0.6 |
| <b>P15</b> |           | 37P    | 0.42 | 0.56 | 0.76 | 0.80 | gb           | 6        | baug10     | 0.6 |
| <b>P16</b> |           | 39P    | 0.52 | 0.60 | 0.76 | 0.80 | rf           | 0        | aug20      | 0.8 |
| <b>P17</b> |           | 39P    | 0.52 | 0.56 | 0.76 | 0.78 | rf           | 6        | aug10      | 0.8 |
| <b>P18</b> |           | 39P    | 0.51 | 0.63 | 0.76 | 0.82 | rf           | 6        | aug10      | 0.8 |
| <b>P19</b> |           | PaO1   | 0.52 | 0.32 | 0.77 | 0.68 | svm          | 6        | baug20     | 0.8 |
| <b>P20</b> |           | PaO1   | 0.50 | 0.22 | 0.75 | 0.63 | svm          | 6        | baug10     | 0.8 |
| <b>P21</b> |           | PaO1   | 0.48 | 0.71 | 0.74 | 0.86 | svm          | 6        | baug10     | 1.0 |
| <b>P22</b> | 120       | 25P    | 0.47 | 0.47 | 0.71 | 0.71 | dt           | 0        | baug20     | 0.8 |
| <b>P23</b> |           | 25P    | 0.41 | 0.71 | 0.82 | 0.89 | svm          | 6        | baug10     | 1.0 |
| <b>P24</b> |           | 25P    | 0.40 | 0.25 | 0.71 | 0.41 | dt           | 0        | baug10     | 1.0 |
| <b>P25</b> |           | 26P    | 0.59 | 0.81 | 0.82 | 0.91 | rf           | 0        | baug10     | 0.8 |
| <b>P26</b> |           | 26P    | 0.57 | 0.78 | 0.82 | 0.89 | dt           | 2        | baug20     | 0.8 |
| <b>P27</b> |           | 26P    | 0.56 | 0.76 | 0.81 | 0.89 | rf           | 0        | aug20      | 0.8 |
| <b>P28</b> |           | 27P    | 0.47 | 1.00 | 0.77 | 1.00 | gb           | 2        | baug10     | 0.8 |
| <b>P29</b> |           | 27P    | 0.46 | 0.60 | 0.77 | 0.82 | svm          | 0        | aug10      | 1.0 |
| <b>P30</b> |           | 27P    | 0.46 | 0.60 | 0.77 | 0.82 | svm          | 0        | aug20      | 0.8 |
| <b>P31</b> |           | 39P    | 0.78 | 1.00 | 0.96 | 1.00 | gb           | 2        | baug10     | 0.6 |
| <b>P32</b> |           | 39P    | 0.78 | 1.00 | 0.96 | 1.00 | dt           | 2        | baug10     | 0.6 |
| <b>P33</b> |           | 39P    | 0.76 | 1.00 | 0.96 | 1.00 | dt           | 0        | aug10      | 0.6 |

**Table S14.** Preliminary models P1-P33 associated hyperparameters

| # Models | Hyperparameters                                                                                                                                                        |
|----------|------------------------------------------------------------------------------------------------------------------------------------------------------------------------|
| P1       | {'n_estimators': 191, 'max_depth': 11, 'min_samples_leaf': 1}                                                                                                          |
| P2       | {'class_weight': {0: 1.0, 1: 1.0}, 'n_estimators': 51, 'max_depth': 121, 'min_samples_leaf': 191}                                                                      |
| P3       | {'class_weight': {0: 1.0, 1: 1.1}, 'criterion': 'gini', 'splitter': 'best', 'max_depth': 11, 'min_samples_split': 16, 'min_samples_leaf': 11, 'max_features': None}    |
| P4       | {'class_weight': {0: 3.0, 1: 1.0}, 'criterion': 'gini', 'splitter': 'best', 'max_depth': 1, 'min_samples_split': 6, 'min_samples_leaf': 6, 'max_features': None}       |
| P5       | {'class_weight': {0: 1.0, 1: 1.4}, 'criterion': 'gini', 'splitter': 'best', 'max_depth': 6, 'min_samples_split': 1, 'min_samples_leaf': 16, 'max_features': 'auto'}    |
| P6       | {'class_weight': {0: 1.0, 1: 1.1}, 'criterion': 'entropy', 'splitter': 'best', 'max_depth': 1, 'min_samples_split': 16, 'min_samples_leaf': 11, 'max_features': None}  |
| P7       | {'class_weight': {0: 1.0, 1: 1.1}, 'criterion': 'gini', 'splitter': 'best', 'max_depth': 11, 'min_samples_split': 11, 'min_samples_leaf': 16, 'max_features': 'auto'}  |
| P8       | {'n_estimators': 191, 'max_depth': 191, 'min_samples_leaf': 121}                                                                                                       |
| P9       | {'n_estimators': 81, 'max_depth': 181, 'min_samples_leaf': 1}                                                                                                          |
| P10      | {'n_estimators': 81, 'max_depth': 171, 'min_samples_leaf': 41}                                                                                                         |
| P11      | {'class_weight': {0: 1.4, 1: 1.0}, 'n_estimators': 51, 'max_depth': 41, 'min_samples_leaf': 1}                                                                         |
| P12      | {'n_estimators': 21, 'max_depth': 31, 'min_samples_leaf': 11}                                                                                                          |
| P13      | {'class_weight': {0: 1.0, 1: 1.1}, 'n_estimators': 171, 'max_depth': 91, 'min_samples_leaf': 161}                                                                      |
| P14      | {'n_neighbors': 26, 'weights': 'uniform', 'algorithm': 'brute', 'leaf_size': 11, 'metric': 'minkowski', 'metric_params': None, 'p': 1}                                 |
| P15      | {'n_estimators': 11, 'max_depth': 161, 'min_samples_leaf': 71}                                                                                                         |
| P16      | {'class_weight': {0: 1.5, 1: 1.0}, 'n_estimators': 151, 'max_depth': 171, 'min_samples_leaf': 181}                                                                     |
| P17      | {'class_weight': {0: 1.0, 1: 1.1}, 'n_estimators': 111, 'max_depth': 131, 'min_samples_leaf': 111}                                                                     |
| P18      | {'class_weight': {0: 1.0, 1: 1.0}, 'n_estimators': 31, 'max_depth': 91, 'min_samples_leaf': 61}                                                                        |
| P19      | {'class_weight': {0: 1.0, 1: 1.3}, 'C': 0.3418, 'kernel': 'sigmoid', 'probability': True}                                                                              |
| P20      | {'class_weight': {0: 1.0, 1: 1.5}, 'C': 21.6, 'kernel': 'sigmoid', 'probability': True}                                                                                |
| P21      | {'class_weight': {0: 1.2, 1: 1.0}, 'C': 8.3, 'kernel': 'linear', 'probability': True}                                                                                  |
| P22      | {'class_weight': {0: 1.4, 1: 1.0}, 'criterion': 'entropy', 'splitter': 'best', 'max_depth': 1, 'min_samples_split': 11, 'min_samples_leaf': 11, 'max_features': None}  |
| P23      | {'class_weight': {0: 2.5, 1: 1.0}, 'C': 1.4, 'kernel': 'rbf', 'probability': True}                                                                                     |
| P24      | {'class_weight': {0: 1.0, 1: 1.2}, 'criterion': 'entropy', 'splitter': 'random', 'max_depth': 1, 'min_samples_split': 16, 'min_samples_leaf': 1, 'max_features': None} |
| P25      | {'class_weight': {0: 1.3, 1: 1.0}, 'n_estimators': 161, 'max_depth': 181, 'min_samples_leaf': 41}                                                                      |
| P26      | {'class_weight': {0: 1.0, 1: 1.1}, 'criterion': 'gini', 'splitter': 'random', 'max_depth': 11, 'min_samples_split': 6, 'min_samples_leaf': 6, 'max_features': 'auto'}  |
| P27      | {'class_weight': {0: 3.0, 1: 1.0}, 'n_estimators': 191, 'max_depth': 151, 'min_samples_leaf': 81}                                                                      |
| P28      | {'n_estimators': 91, 'max_depth': 141, 'min_samples_leaf': 71}                                                                                                         |
| P29      | {'class_weight': {0: 1.5, 1: 1.0}, 'C': 0.0954, 'kernel': 'sigmoid', 'probability': True}                                                                              |
| P30      | {'class_weight': {0: 1.0, 1: 1.0}, 'C': 1.6, 'kernel': 'linear', 'probability': True}                                                                                  |
| P31      | {'n_estimators': 111, 'max_depth': 81, 'min_samples_leaf': 51}                                                                                                         |

- P32** {'class\_weight': {0: 1.0, 1: 3.0}, 'criterion': 'entropy', 'splitter': 'best', 'max\_depth': 16, 'min\_samples\_split': 11, 'min\_samples\_leaf': 6, 'max\_features': None}
- P33** {'class\_weight': {0: 1.4, 1: 1.0}, 'criterion': 'gini', 'splitter': 'best', 'max\_depth': 6, 'min\_samples\_split': 16, 'min\_samples\_leaf': 1, 'max\_features': 'sqrt'}



**Table S15.** Intermediate ML models I100\_1-I100\_11 with the data augmentation and 100 random iterations

| # Model | threshold | strain | MCC  |      | ACC  |      | ML<br>Method | comp min | Preprocess<br>function | pc  |
|---------|-----------|--------|------|------|------|------|--------------|----------|------------------------|-----|
|         |           |        | cv   | fit  | cv   | fit  |              |          |                        |     |
| I100_1  | 40        | PA14   | 0.68 | 1.00 | 0.93 | 1.00 | gb           | 0        | baug10                 | 0.8 |
| I100_2  |           | 22P    | 0.47 | 0.47 | 0.78 | 0.78 | dt           | 2        | aug10                  | 1.0 |
| I100_3  |           | 25P    | 0.52 | 0.95 | 0.82 | 0.98 | gb           | 4        | aug20                  | 0.8 |
| I100_4  |           | 27P    | 0.72 | 1.00 | 0.93 | 1.00 | gb           | 2        | aug10                  | 0.8 |
| I100_5  |           | 37P    | 0.71 | 0.91 | 0.88 | 0.96 | gb           | 0        | baug10                 | 0.9 |
| I100_6  |           | 39P    | 0.64 | 1.00 | 0.82 | 1.00 | rf           | 4        | aug20                  | 0.9 |
| I100_7  | 120       | PaO1   | 0.57 | 0.27 | 0.79 | 0.65 | svm          | 6        | aug10                  | 0.8 |
| I100_8  |           | 25P    | 0.71 | 0.67 | 0.89 | 0.88 | dt           | 0        | baug20                 | 0.9 |
| I100_9  |           | 26P    | 0.73 | 1.00 | 0.89 | 1.00 | dt           | 2        | baug20                 | 0.9 |
| I100_10 |           | 27P    | 0.64 | 0.26 | 0.84 | 0.70 | svm          | 0        | aug20                  | 0.8 |
| I100_11 |           | 39P    | 0.88 | 1.00 | 0.98 | 1.00 | gb           | 2        | baug10                 | 0.6 |

**Table S16.** Intermediate ML models I100\_1-I100\_11 associated hyperparameters as listed in Table SM15

| # Models | Hyperparameters                                                                                                                                                      |
|----------|----------------------------------------------------------------------------------------------------------------------------------------------------------------------|
| I100_1   | {'n_estimators': 189, 'max_depth': 3, 'min_samples_leaf': 160}                                                                                                       |
| I100_2   | {'class_weight': {0: 1.5, 1: 1.0}, 'criterion': 'gini', 'splitter': 'best', 'max_depth': 1, 'min_samples_split': 11, 'min_samples_leaf': 2, 'max_features': None}    |
| I100_3   | {'n_estimators': 27, 'max_depth': 140, 'min_samples_leaf': 153}                                                                                                      |
| I100_4   | {'n_estimators': 38, 'max_depth': 162, 'min_samples_leaf': 52}                                                                                                       |
| I100_5   | {'n_estimators': 71, 'max_depth': 47, 'min_samples_leaf': 199}                                                                                                       |
| I100_6   | {'class_weight': {0: 1.5, 1: 1.0}, 'n_estimators': 98, 'max_depth': 124, 'min_samples_leaf': 5}                                                                      |
| I100_7   | {'class_weight': {0: 1.5, 1: 1.0}, 'C': 1.0207, 'kernel': 'sigmoid', 'probability': True}                                                                            |
| I100_8   | {'class_weight': {0: 1.0, 1: 1.2}, 'criterion': 'entropy', 'splitter': 'best', 'max_depth': 2, 'min_samples_split': 6, 'min_samples_leaf': 14, 'max_features': None} |
| I100_9   | {'class_weight': {0: 1.0, 1: 1.1}, 'criterion': 'gini', 'splitter': 'best', 'max_depth': 6, 'min_samples_split': 13, 'min_samples_leaf': 12, 'max_features': 'sqrt'} |
| I100_10  | {'class_weight': {0: 1.0, 1: 3.0}, 'C': 21.6, 'kernel': 'sigmoid', 'probability': True}                                                                              |
| I100_11  | {'n_estimators': 99, 'max_depth': 76, 'min_samples_leaf': 20}                                                                                                        |

**Table S17.** Intermediate ML models with the data augmentation setting selected from models I100\_1-I100\_11 and 1000 random iterations

| # Model         | threshold | strain | MCC  |      | ACC  |      | ML<br>Method | comp min | Preprocess<br>function | pc  |
|-----------------|-----------|--------|------|------|------|------|--------------|----------|------------------------|-----|
|                 |           |        | cv   | fit  | cv   | fit  |              |          |                        |     |
| <b>I1000_1</b>  | 40        | PA14   | 0.62 | 1.00 | 0.91 | 1.00 | gb           | 0        | baug10                 | 0.8 |
| <b>I1000_2</b>  |           | 22P    | 0.47 | 0.62 | 0.78 | 0.83 | dt           | 2        | aug10                  | 1.0 |
| <b>I1000_3</b>  |           | 25P    | 0.52 | 0.67 | 0.82 | 0.88 | gb           | 4        | aug20                  | 0.8 |
| <b>I1000_4</b>  |           | 27P    | 0.72 | 1.00 | 0.93 | 1.00 | gb           | 2        | aug10                  | 0.8 |
| <b>I1000_5</b>  |           | 37P    | 0.71 | 0.82 | 0.88 | 0.92 | gb           | 0        | baug10                 | 0.9 |
| <b>I1000_6</b>  |           | 39P    | 0.59 | 0.92 | 0.80 | 0.96 | rf           | 4        | aug20                  | 0.9 |
| <b>I1000_7</b>  | 120       | PaO1   | 0.67 | 0.27 | 0.84 | 0.65 | svm          | 6        | aug10                  | 0.8 |
| <b>I1000_8</b>  |           | 25P    | 0.74 | 0.67 | 0.91 | 0.88 | dt           | 0        | baug20                 | 0.9 |
| <b>I1000_9</b>  |           | 26P    | 0.73 | 0.96 | 0.89 | 0.98 | dt           | 2        | baug20                 | 0.9 |
| <b>I1000_10</b> |           | 27P    | 0.64 | 0.31 | 0.84 | 0.72 | svm          | 0        | aug20                  | 0.8 |
| <b>I1000_11</b> |           | 39P    | 0.88 | 1.00 | 0.98 | 1.00 | gb           | 2        | baug10                 | 0.6 |

**Table S18.** Intermediate models I1000\_1-I1000\_11 associated hyperparameters as listed in Table SM17

| # Models        | Hyperparameters                                                                                                                                                        |
|-----------------|------------------------------------------------------------------------------------------------------------------------------------------------------------------------|
| <b>I1000_1</b>  | {'n_estimators': 161, 'max_depth': 177, 'min_samples_leaf': 160}                                                                                                       |
| <b>I1000_2</b>  | {'class_weight': {0: 2.5, 1: 1.0}, 'criterion': 'entropy', 'splitter': 'best', 'max_depth': 2, 'min_samples_split': 3, 'min_samples_leaf': 20, 'max_features': None}   |
| <b>I1000_3</b>  | {'n_estimators': 13, 'max_depth': 40, 'min_samples_leaf': 139}                                                                                                         |
| <b>I1000_4</b>  | {'n_estimators': 56, 'max_depth': 129, 'min_samples_leaf': 60}                                                                                                         |
| <b>I1000_5</b>  | {'n_estimators': 30, 'max_depth': 30, 'min_samples_leaf': 131}                                                                                                         |
| <b>I1000_6</b>  | {'class_weight': {0: 1.0, 1: 1.1}, 'n_estimators': 25, 'max_depth': 183, 'min_samples_leaf': 28}                                                                       |
| <b>I1000_7</b>  | {'class_weight': {0: 1.1, 1: 1.0}, 'C': 21.6, 'kernel': 'sigmoid', 'probability': True}                                                                                |
| <b>I1000_8</b>  | {'class_weight': {0: 2.5, 1: 1.0}, 'criterion': 'gini', 'splitter': 'best', 'max_depth': 2, 'min_samples_split': 8, 'min_samples_leaf': 14, 'max_features': None}      |
| <b>I1000_9</b>  | {'class_weight': {0: 1.0, 1: 2.5}, 'criterion': 'entropy', 'splitter': 'random', 'max_depth': 11, 'min_samples_split': 8, 'min_samples_leaf': 5, 'max_features': None} |
| <b>I1000_10</b> | {'class_weight': {0: 1.0, 1: 2.5}, 'C': 21.6, 'kernel': 'sigmoid', 'probability': True}                                                                                |
| <b>I1000_11</b> | {'n_estimators': 63, 'max_depth': 179, 'min_samples_leaf': 47}                                                                                                         |

**Table S19.** Final models PF1-PF11 with the data augmentation setting selected from models I1000\_1-I1000\_11 and 10000 random iterations to seek for the best hyperparameters.

| # Model     | threshold | strain | MCC  |      | ACC  |      | ML<br>Method | comp min | Preprocess<br>function | pc  |
|-------------|-----------|--------|------|------|------|------|--------------|----------|------------------------|-----|
|             |           |        | cv   | fit  | cv   | fit  |              |          |                        |     |
| <b>PF1</b>  | 40        | PA14   | 0.68 | 1.00 | 0.93 | 1.00 | gb           | 0        | baug10                 | 0.8 |
| <b>PF2</b>  |           | 22P    | 0.50 | 0.70 | 0.80 | 0.87 | dt           | 2        | aug10                  | 1.0 |
| <b>PF3</b>  |           | 25P    | 0.53 | 1.00 | 0.82 | 1.00 | gb           | 4        | aug20                  | 0.8 |
| <b>PF4</b>  |           | 27P    | 0.79 | 1.00 | 0.95 | 1.00 | gb           | 2        | aug10                  | 0.8 |
| <b>PF5</b>  |           | 37P    | 0.76 | 0.76 | 0.90 | 0.90 | gb           | 0        | baug10                 | 0.9 |
| <b>PF6</b>  |           | 39P    | 0.60 | 1.00 | 0.80 | 1.00 | rf           | 4        | aug20                  | 0.9 |
| <b>PF7</b>  |           | PaO1   | 0.67 | 0.40 | 0.84 | 0.72 | svm          | 6        | aug10                  | 0.8 |
| <b>PF8</b>  | 120       | 25P    | 0.74 | 0.67 | 0.91 | 0.88 | dt           | 0        | baug20                 | 0.9 |
| <b>PF9</b>  |           | 26P    | 0.78 | 0.96 | 0.91 | 0.98 | dt           | 2        | baug20                 | 0.9 |
| <b>PF10</b> |           | 27P    | 0.60 | 0.50 | 0.82 | 0.79 | svm          | 0        | aug20                  | 0.8 |
| <b>PF11</b> |           | 39P    | 0.88 | 1.00 | 0.98 | 1.00 | gb           | 2        | baug10                 | 0.6 |

aug10: data augmentation function in which the data are increase for 10 times in a range of  $\pm 15\%$ ,

aug20: data augmentation function in which the data are increase for 20 times in a range of  $\pm 15\%$ ,

baug10: data augmentation function in which the data are increase for 10 times in a range of  $\pm 15\%$  balancing the data among the two classes (active or inactives),

baug20: data augmentation function in which the data are increase for 20 times in a range of  $\pm 15\%$  balancing the data among the two classes (active or inactives),

pc: amount of explained variance by principal component (e.g. 0.6 = 60%)

comp min: number of minimal occurrences for a components to be maintained in the calculations

**Table S20.** Models hyperparameters as listed in Table SM19

| # Models    | Hyperparameters                                                                                                                                                       |
|-------------|-----------------------------------------------------------------------------------------------------------------------------------------------------------------------|
| <b>PF1</b>  | {'n_estimators': 48, 'max_depth': 133, 'min_samples_leaf': 133}                                                                                                       |
| <b>PF2</b>  | {'class_weight': {0: 2.5, 1: 1.0}, 'criterion': 'gini', 'splitter': 'best', 'max_depth': 3, 'min_samples_split': 12, 'min_samples_leaf': 11, 'max_features': None}    |
| <b>PF3</b>  | {'n_estimators': 32, 'max_depth': 199, 'min_samples_leaf': 58}                                                                                                        |
| <b>PF4</b>  | {'n_estimators': 111, 'max_depth': 118, 'min_samples_leaf': 123}                                                                                                      |
| <b>PF5</b>  | {'n_estimators': 4, 'max_depth': 54, 'min_samples_leaf': 173}                                                                                                         |
| <b>PF6</b>  | {'class_weight': {0: 1.4, 1: 1.0}, 'n_estimators': 44, 'max_depth': 51, 'min_samples_leaf': 6}                                                                        |
| <b>PF7</b>  | {'class_weight': {0: 1.0, 1: 1.4}, 'C': 10.1, 'kernel': 'sigmoid', 'probability': True}                                                                               |
| <b>PF8</b>  | {'class_weight': {0: 3.0, 1: 1.0}, 'criterion': 'gini', 'splitter': 'best', 'max_depth': 2, 'min_samples_split': 14, 'min_samples_leaf': 1, 'max_features': None}     |
| <b>PF9</b>  | {'class_weight': {0: 1.0, 1: 1.1}, 'criterion': 'entropy', 'splitter': 'best', 'max_depth': 6, 'min_samples_split': 14, 'min_samples_leaf': 13, 'max_features': None} |
| <b>PF10</b> | {'class_weight': {0: 1.0, 1: 2.5}, 'C': 21.6, 'kernel': 'sigmoid', 'probability': True}                                                                               |
| <b>PF11</b> | {'n_estimators': 162, 'max_depth': 92, 'min_samples_leaf': 26}                                                                                                        |

**Table S21.** Optimized final models obtained with 100 random iterations of data augmentation at threshold values of 80% and 100%.

| # Model    | Strain | Threshold | ML Method | MCC  |      | ACC  |      | F1   |      |
|------------|--------|-----------|-----------|------|------|------|------|------|------|
|            |        |           |           | Fit  | CV   | Fit  | CV   | Fit  | CV   |
| <b>F12</b> | PaO1   | 80        | svm       | 0.24 | 0.36 | 0.79 | 0.82 | 0.33 | 0.38 |
| <b>F13</b> | PA14   |           | svm       | 0.25 | 0.58 | 0.74 | 0.85 | 0.83 | 0.90 |
| <b>F14</b> | 22P    |           | dt        | 0.62 | 0.45 | 0.78 | 0.69 | 0.82 | 0.75 |
| <b>F15</b> | 25P    |           | dt        | 0.95 | 0.35 | 0.98 | 0.77 | 0.99 | 0.85 |
| <b>F16</b> | 26P    |           | rf        | 0.93 | 0.34 | 0.96 | 0.67 | 0.95 | 0.61 |
| <b>F17</b> | 27P    |           | dt        | 0.97 | 0.27 | 0.98 | 0.63 | 0.98 | 0.62 |
| <b>F18</b> | 37P    |           | dt        | 0.92 | 0.19 | 0.96 | 0.59 | 0.96 | 0.67 |
| <b>F19</b> | 39P    |           | gb        | 1.00 | 0.68 | 1.00 | 0.88 | 1.00 | 0.92 |
| <b>F20</b> | PaO1   | 100       | dt        | 0.86 | 0.25 | 0.93 | 0.63 | 0.92 | 0.53 |
| <b>F21</b> | PA14   |           | dt        | 0.76 | 0.76 | 0.93 | 0.93 | 0.96 | 0.96 |
| <b>F22</b> | 22P    |           | dt        | 0.88 | 0.20 | 0.96 | 0.74 | 0.98 | 0.84 |
| <b>F23</b> | 25P    |           | dt        | 0.95 | 0.41 | 0.98 | 0.79 | 0.99 | 0.86 |
| <b>F24</b> | 26P    |           | gb        | 1.00 | 0.66 | 1.00 | 0.84 | 1.00 | 0.88 |
| <b>F25</b> | 27P    |           | gb        | 1.00 | 0.36 | 1.00 | 0.68 | 1.00 | 0.71 |
| <b>F26</b> | 37P    |           | gb        | 1.00 | 0.58 | 1.00 | 0.90 | 1.00 | 0.94 |
| <b>F27</b> | 39P    |           | gb        | 1.00 | 0.58 | 1.00 | 0.88 | 1.00 | 0.93 |

**Table S22.** Occurrences of the EOs' chemical components. Only the most frequent compounds are listed.

| Component              | # <sup>a</sup> | Component                   | # <sup>a</sup> | Component               | # <sup>a</sup> |
|------------------------|----------------|-----------------------------|----------------|-------------------------|----------------|
| limonene               | 51             | p-cymen-8-ol                | 10             | linalyl anthranilate    | 6              |
| $\alpha$ -pinene       | 47             | terpinolene                 | 9              | calamenene              | 6              |
| $\beta$ -caryophyllene | 39             | $\alpha$ -citral            | 9              | $\beta$ -phellandrene   | 6              |
| $\beta$ -myrcene       | 36             | $\beta$ -bisabolene         | 9              | 3-carene                | 6              |
| linalool               | 35             | carvacrol                   | 8              | $\alpha$ -cadinol       | 6              |
| eucalyptol             | 33             | $\alpha$ -muurolene         | 8              | spathulenol             | 6              |
| $\beta$ -pinene        | 30             | $\gamma$ -muurolene         | 8              | germacrene d            | 6              |
| o-cymene               | 29             | carvone                     | 8              | $\alpha$ -phellandrene  | 5              |
| $\alpha$ -terpineol    | 28             | bornyl acetate              | 8              | nerol acetate           | 5              |
| caryophyllene oxide    | 27             | eugenol                     | 7              | myrtenol                | 5              |
| terpinen-4-ol          | 26             | thymol                      | 7              | cis- $\beta$ -farnesene | 5              |
| sabinene               | 22             | $\alpha$ -bergamotene       | 7              | $\gamma$ -cadinene      | 5              |
| $\gamma$ -terpinene    | 21             | geranyl acetate             | 7              | estragole               | 5              |
| borneol                | 16             | camphor                     | 7              | cis- $\beta$ -terpineol | 5              |
| humulene               | 16             | pinocarveol                 | 7              | cis-verbenol            | 5              |
| $\delta$ -cadinene     | 13             | $\alpha$ -terpinene         | 7              | elemol                  | 4              |
| camphene               | 13             | $\alpha$ -terpineol acetate | 7              | $\alpha$ -cubebene      | 4              |
| cis-geraniol           | 12             | 1-octen-3-ol                | 6              | cis-carveol             | 4              |
| p-cymene               | 11             | $\beta$ -elemene            | 6              | $\beta$ -citral         | 4              |
| $\alpha$ -copaene      | 11             | humulene epoxide 2          | 6              | methyl thymyl ether     | 4              |

**Figure S1.** Feature importance for model F1 (see main text Table 1). The top 20 components are displayed.

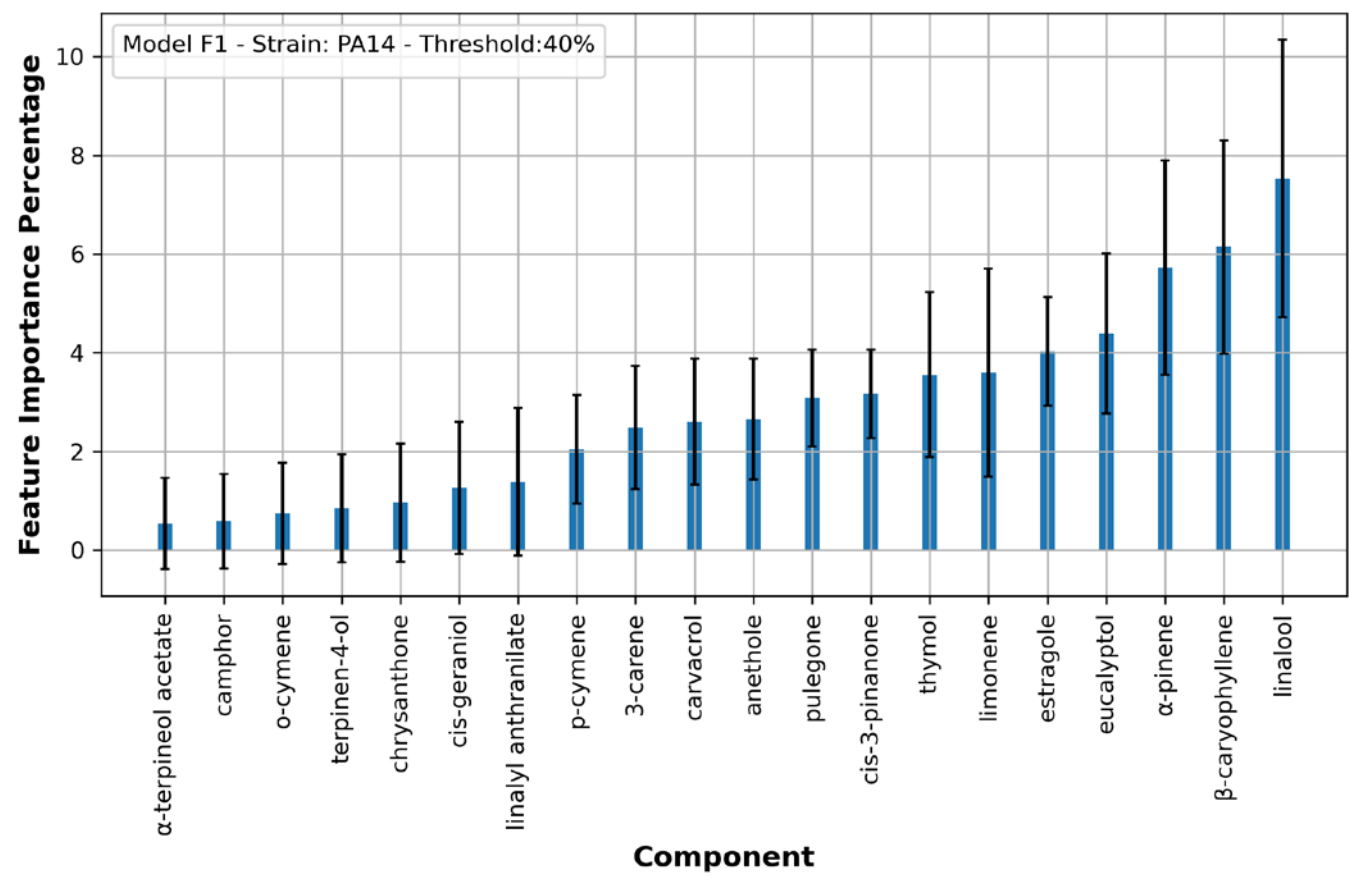



**Figure S2.** Feature importance for model F2 (see main text Table 1). The top 20 components are displayed.

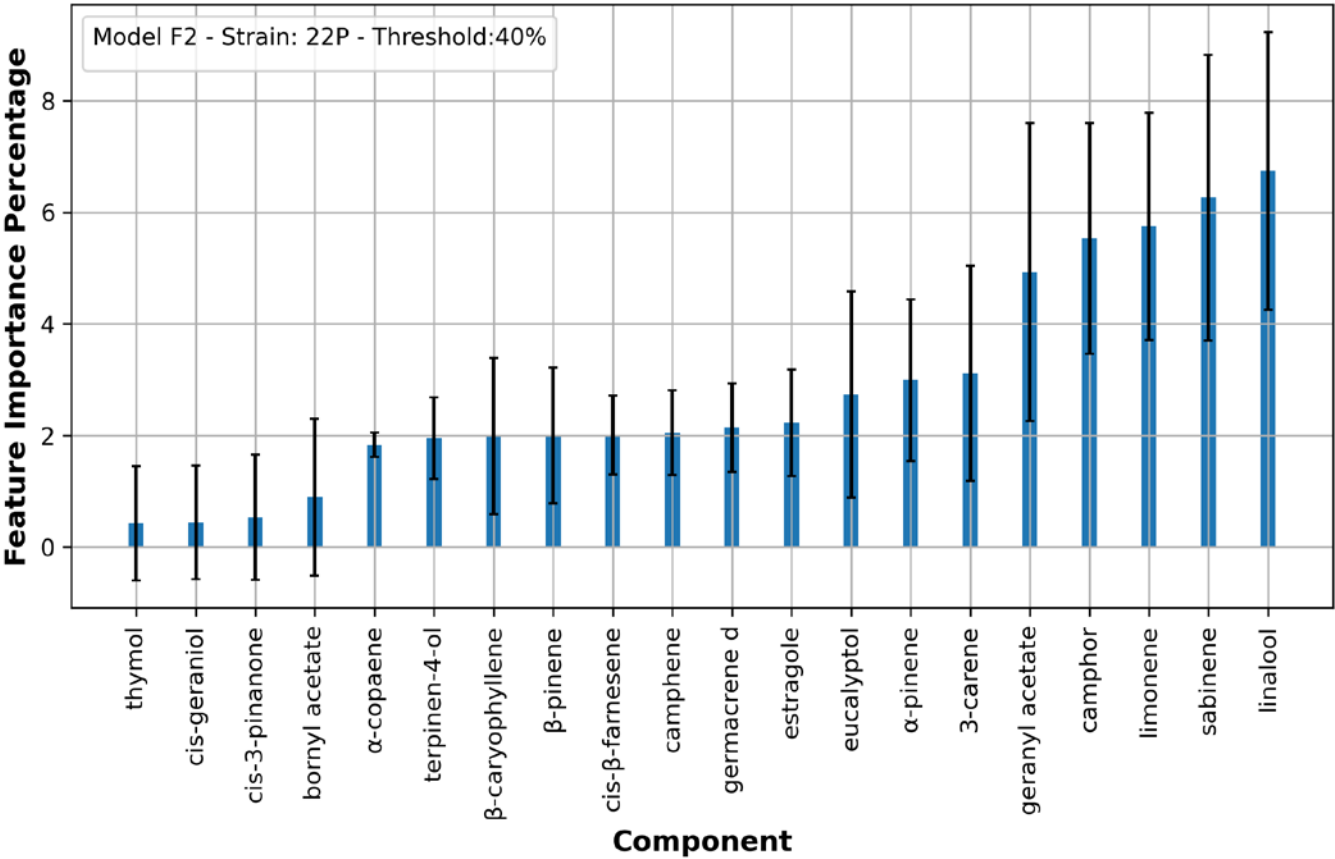

**Figure S3.** Feature importance for model F3 (see main text Table 1). The top 20 components are displayed.

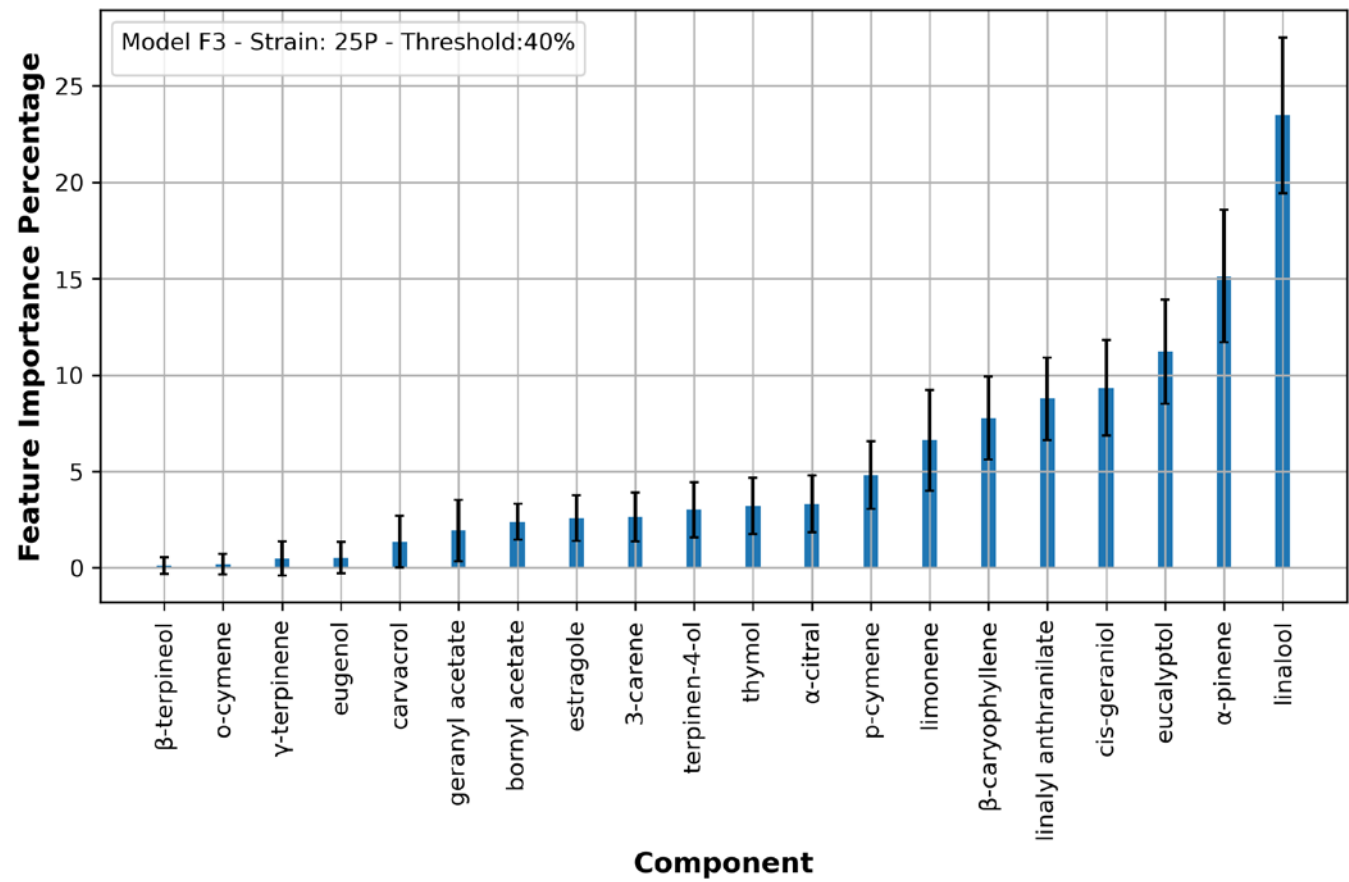

**Figure S4.** Feature importance for model F4 (see main text Table 1). The top 20 components are displayed.

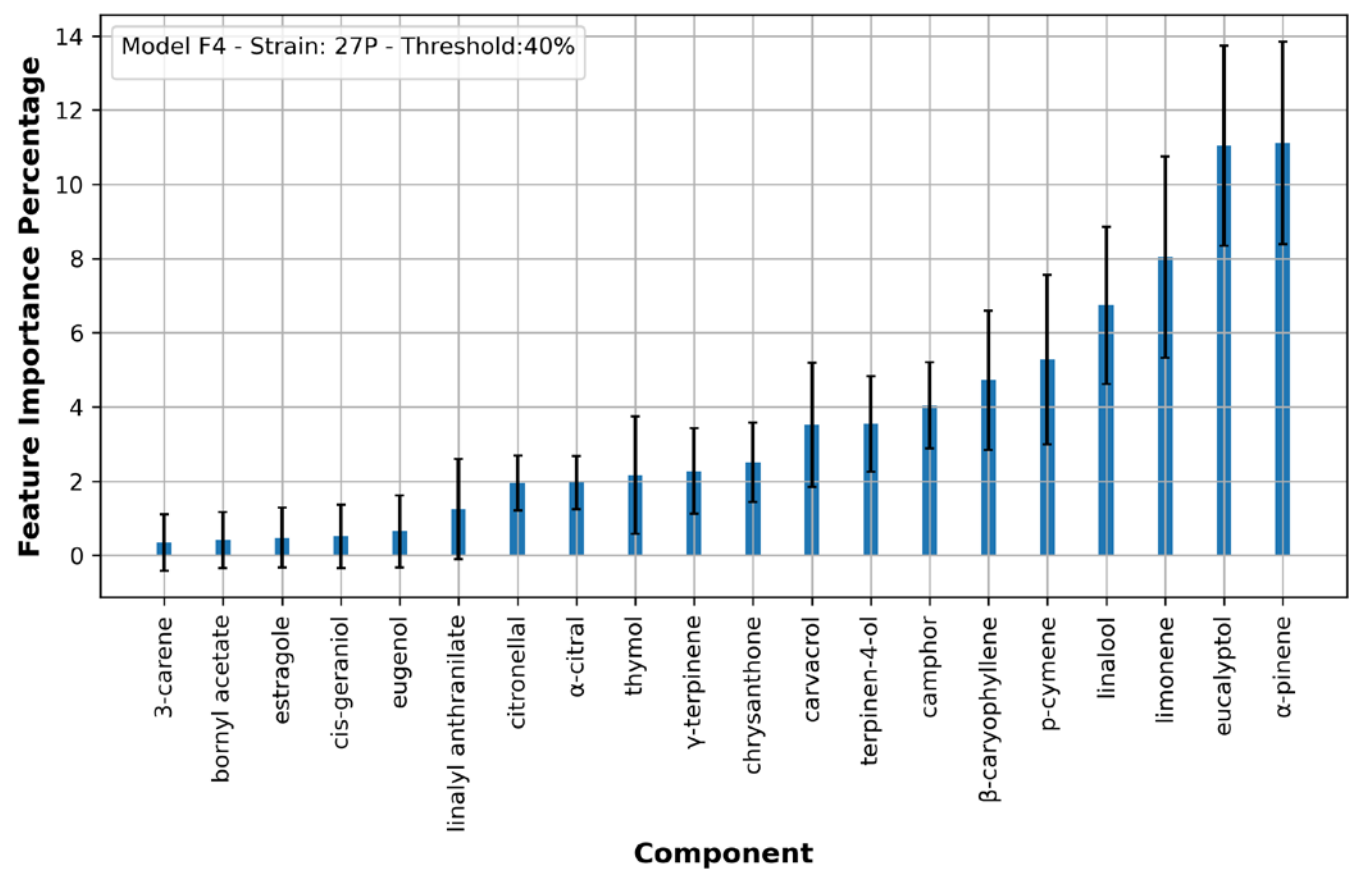

Figure S5. Feature importance for model F5 (see main text Table 1). The top 20 components are displayed.

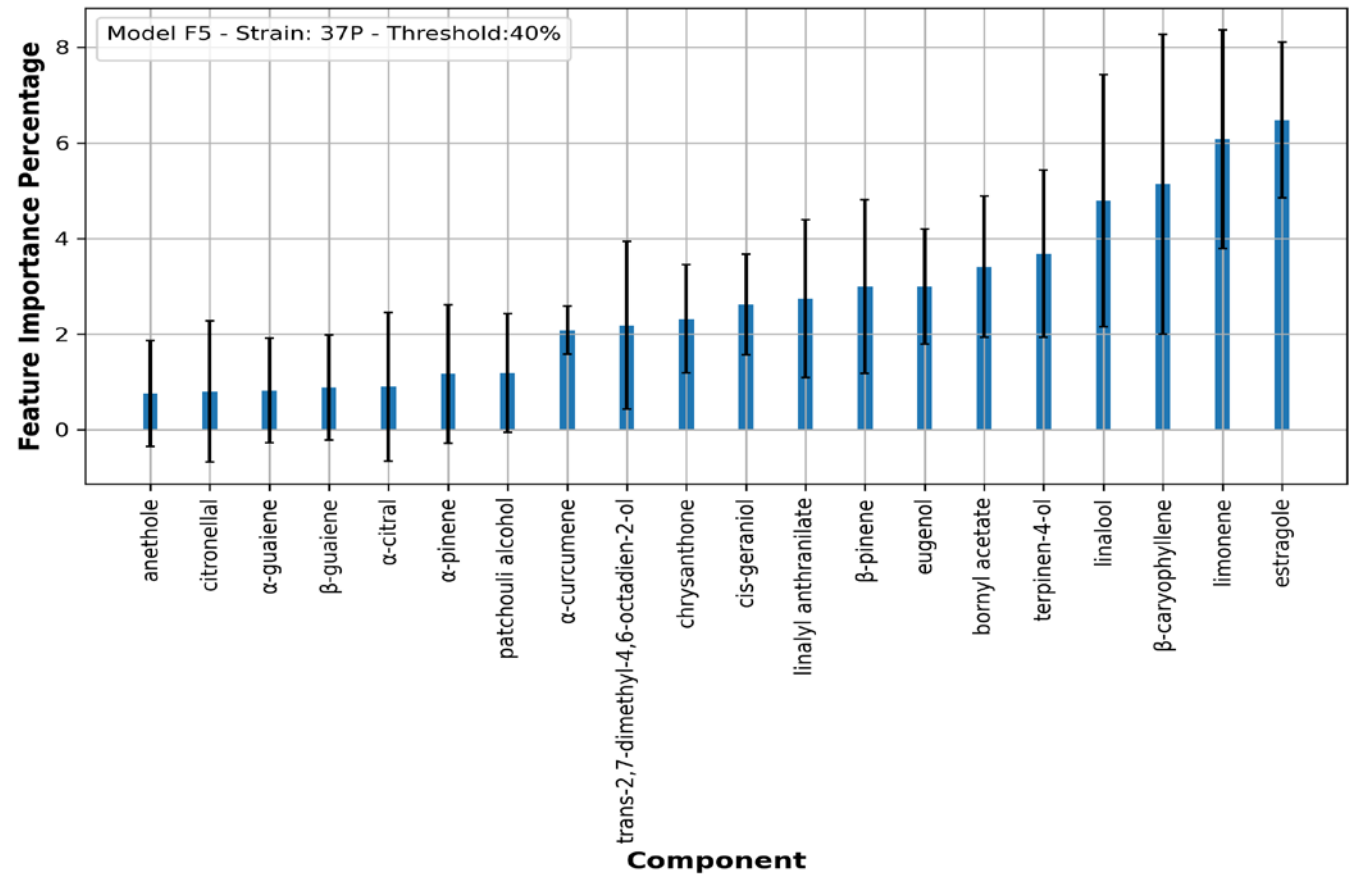

**Figure S6.** Feature importance for model F6 (see main text Table 1). The top 20 components are displayed.

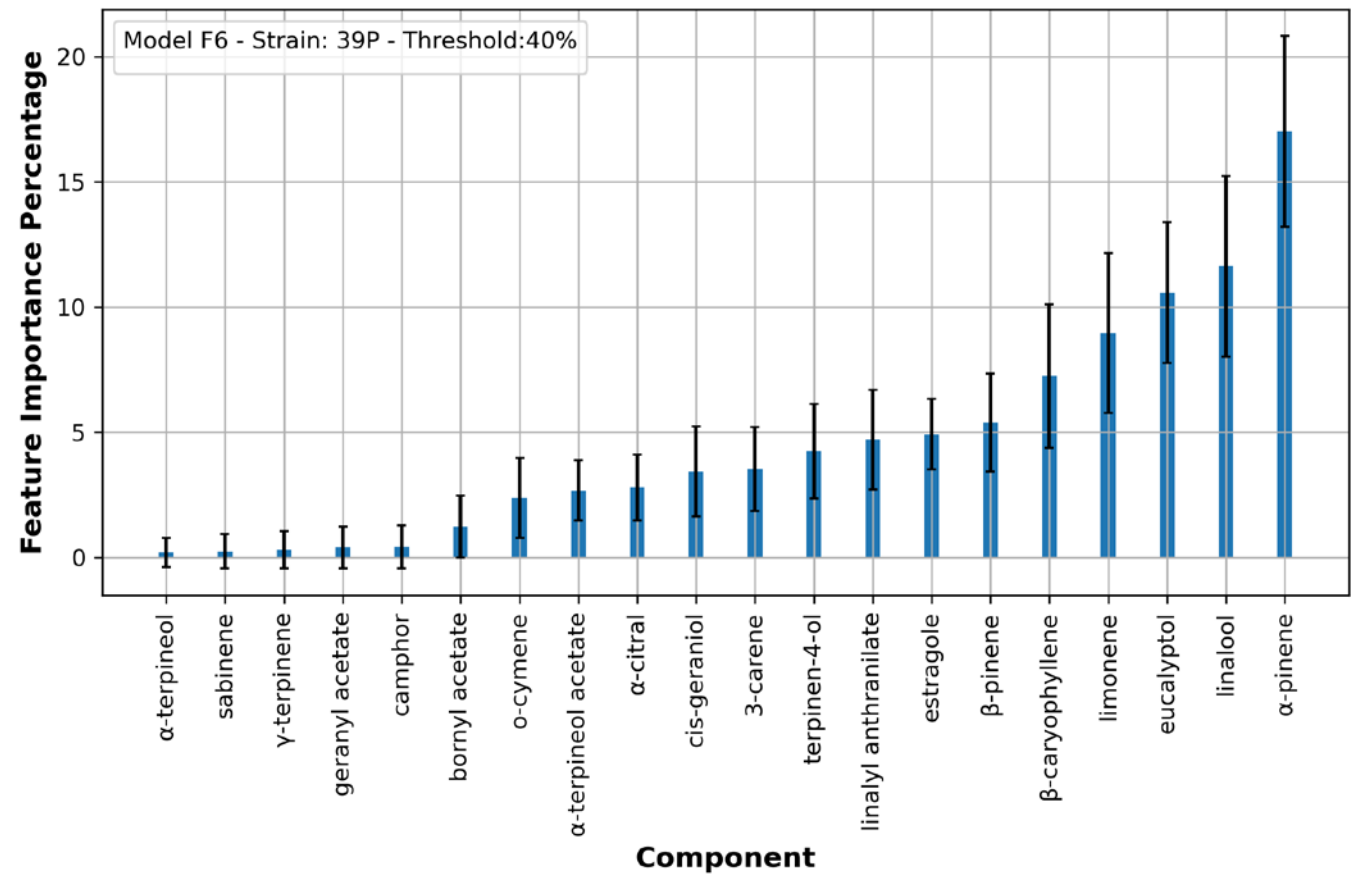

**Figure S7.** Feature importance for model F7 (see main text Table 1). The top 20 components are displayed.

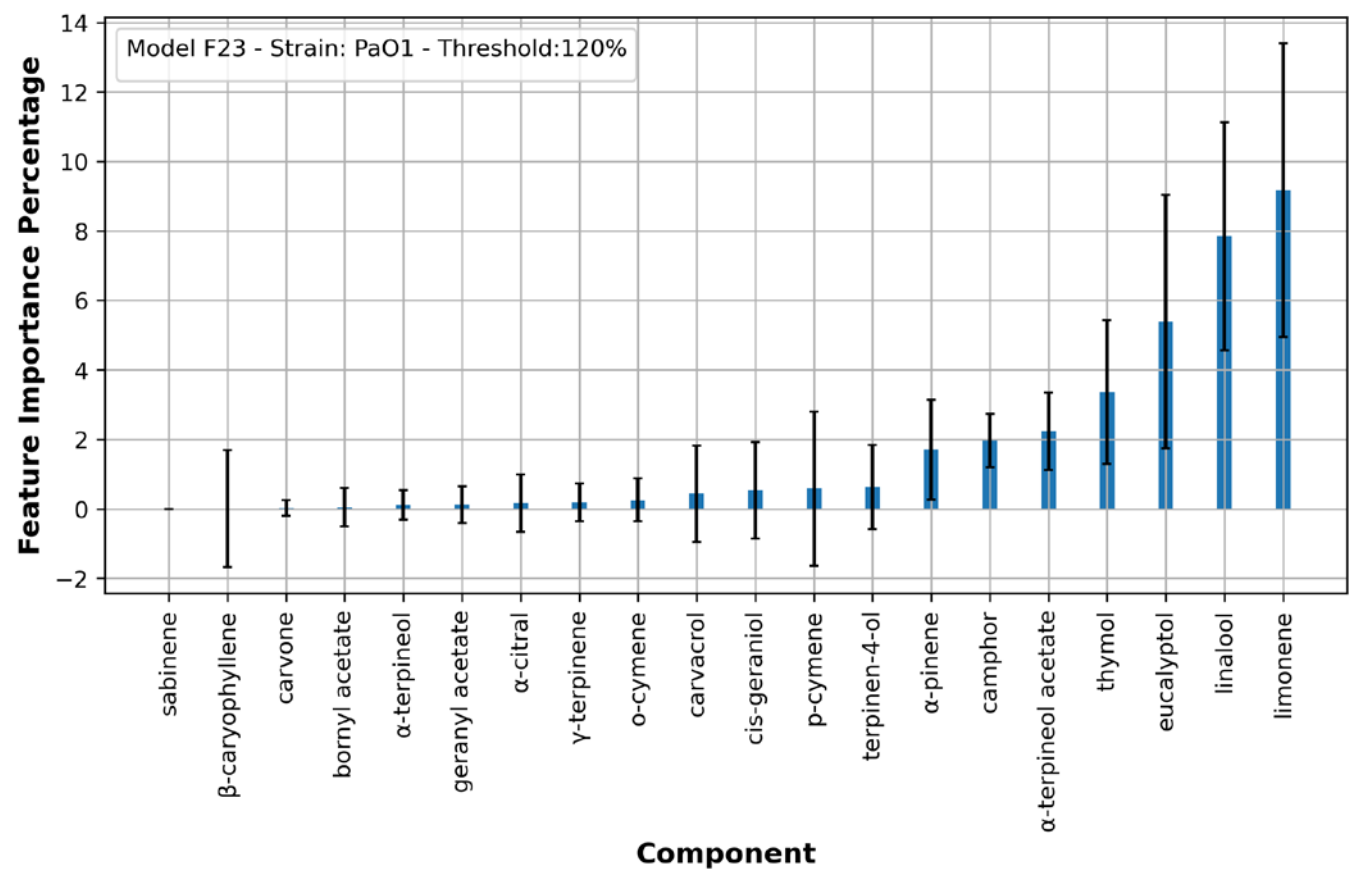

**Figure S8.** Feature importance for model F8 (see main text Table 1). The top 20 components are displayed.

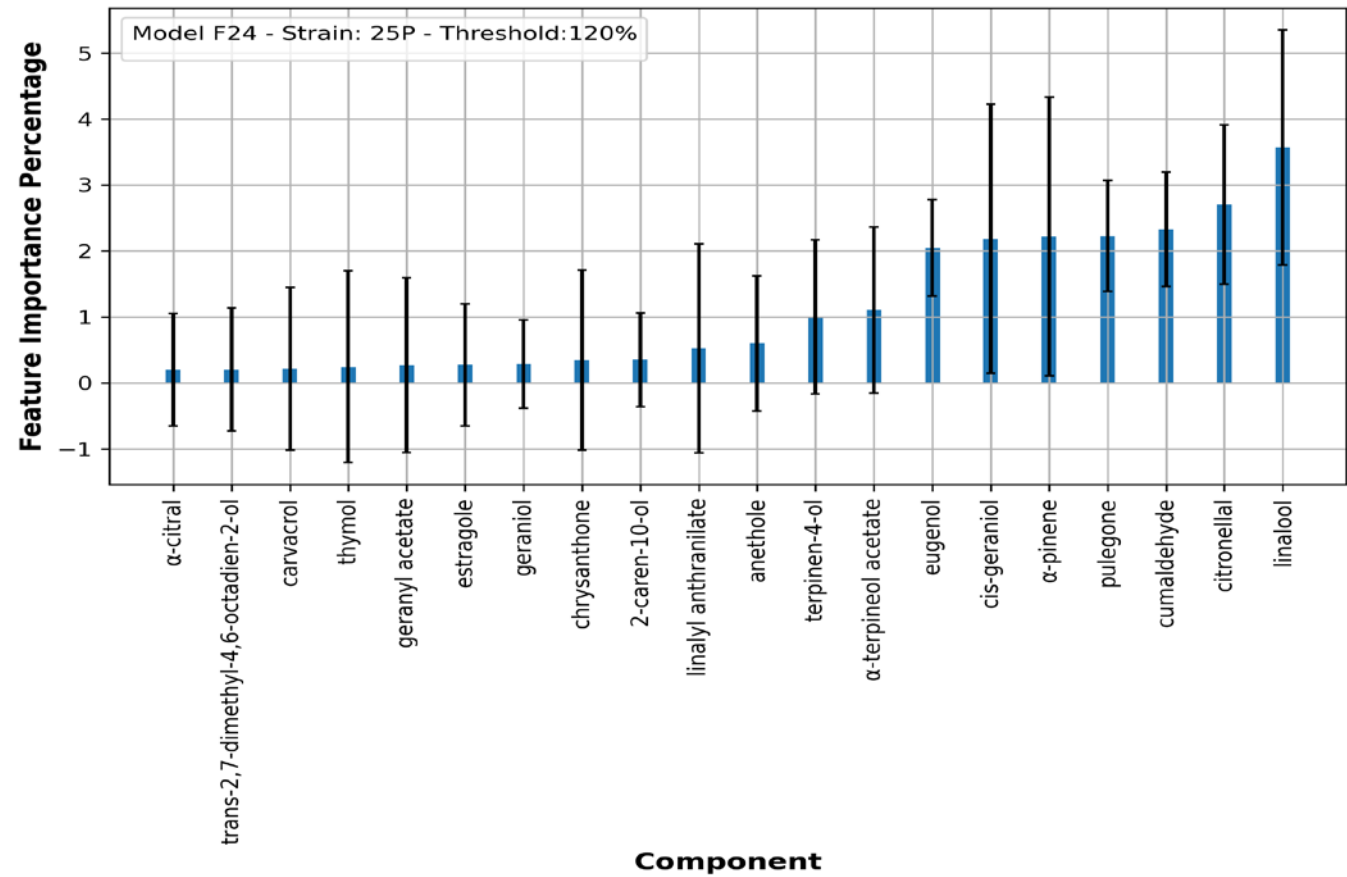

**Figure S9.** Feature importance for model F9 (see main text Table 1). The top 20 components are displayed.

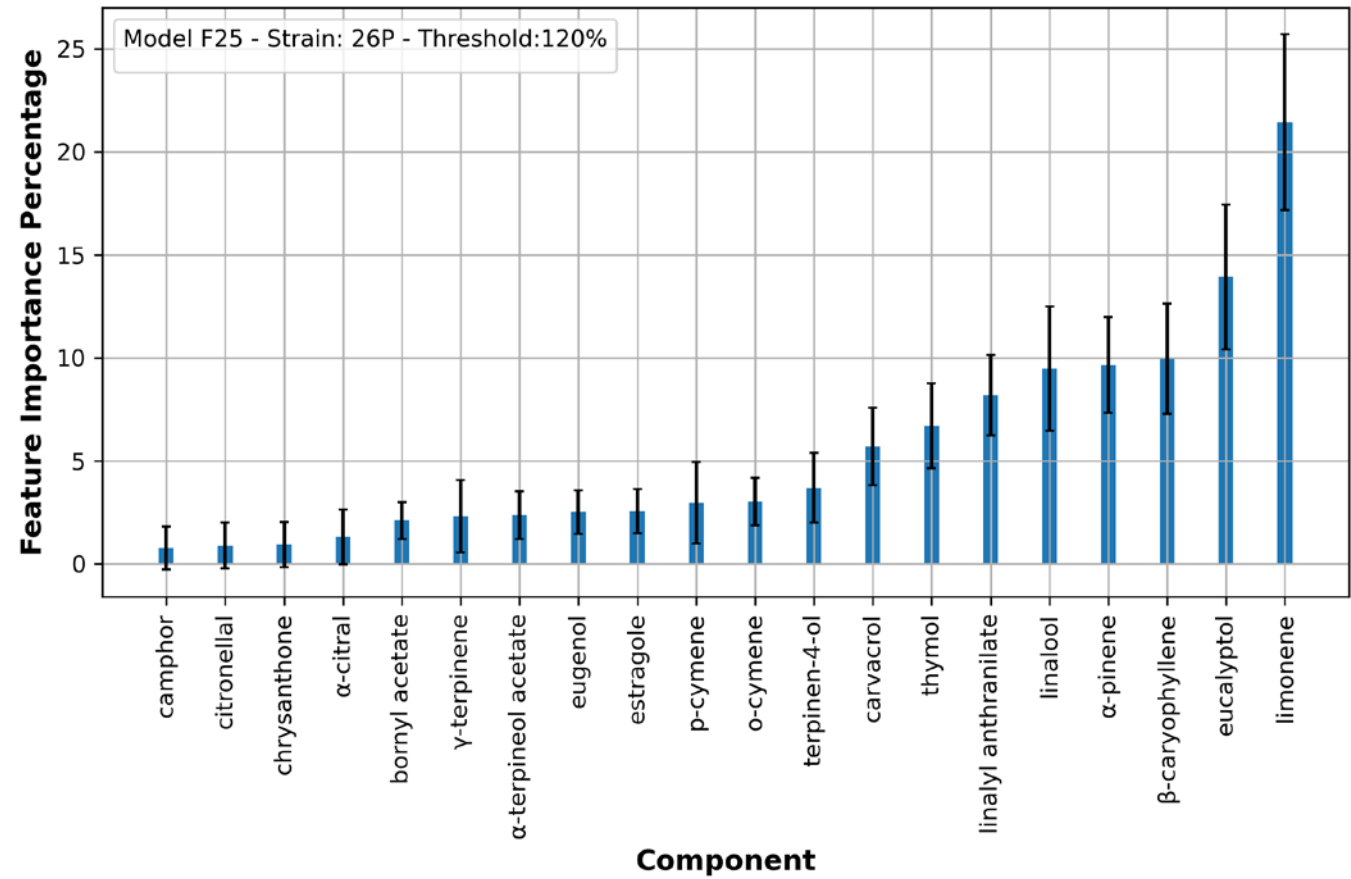



**Figure S10.** Feature importance for model F10 (see main text Table 1). The top 20 components are displayed.

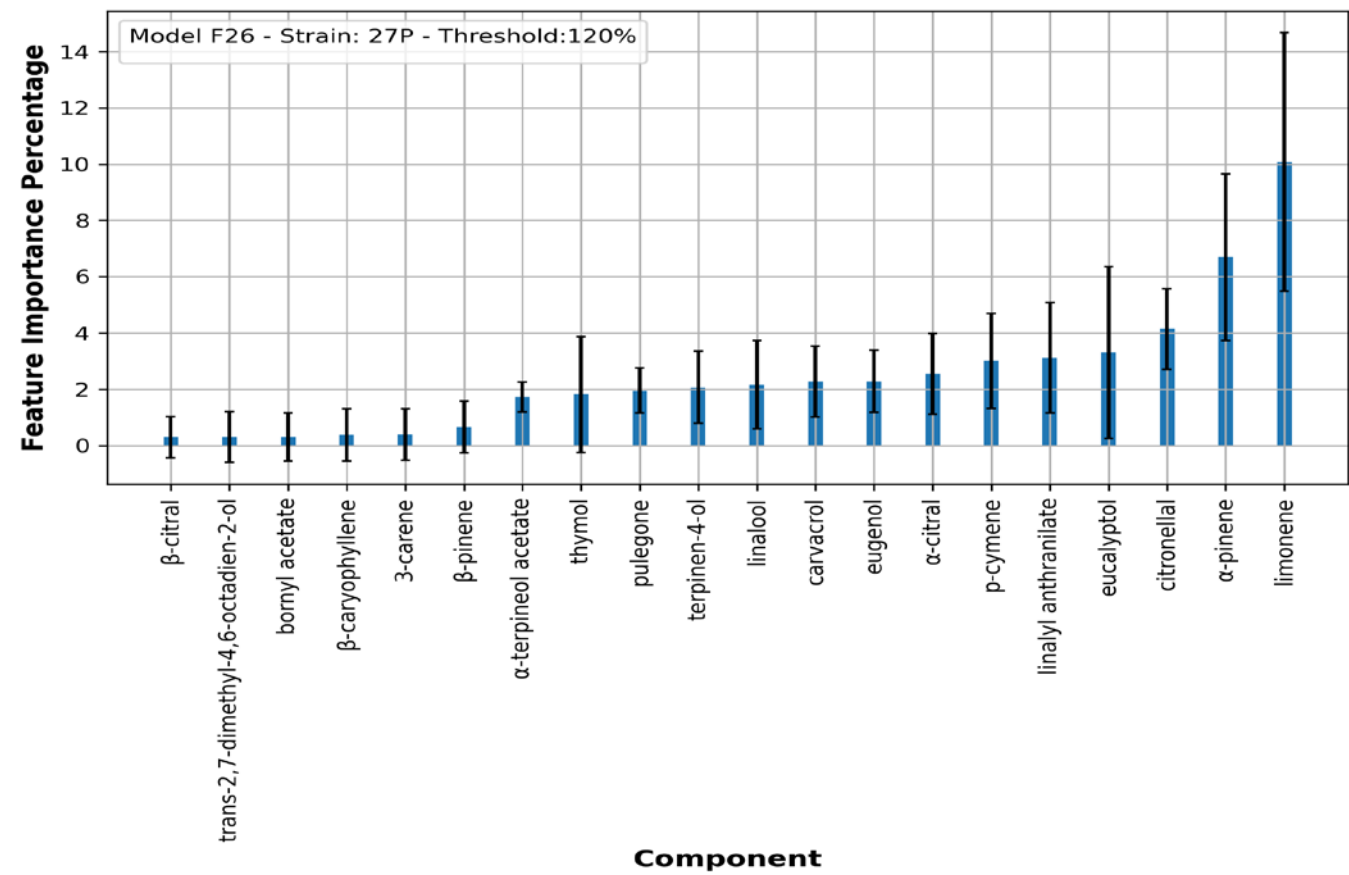

**Figure S11.** Feature importance for model F11 (see main text Table 1). The top 20 components are displayed.

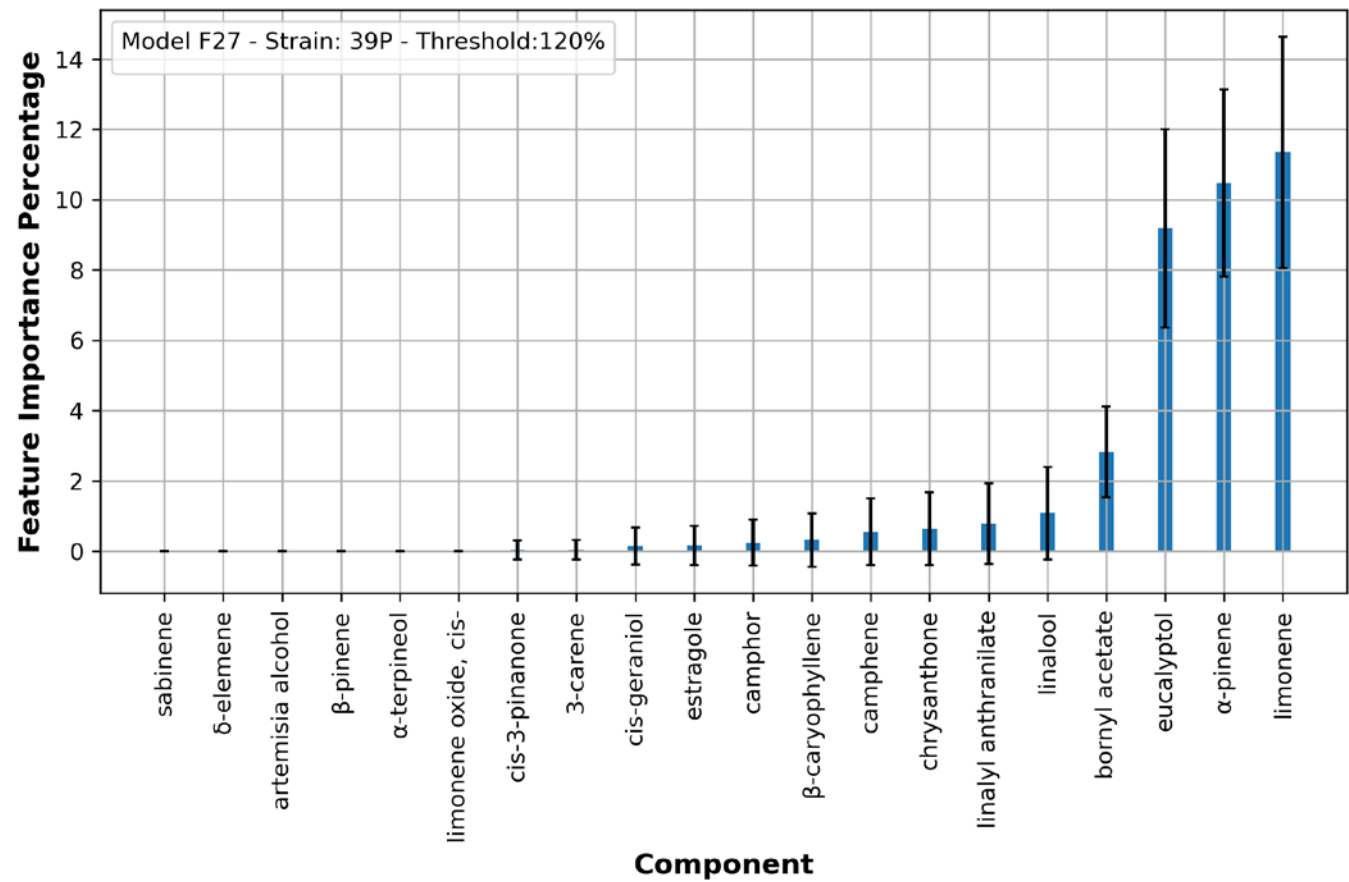

**Figure S12.** Normalized feature importances for the final models F1-F6 developed at threshold value of 40% (see main text Table 1). The top 20 components are displayed.

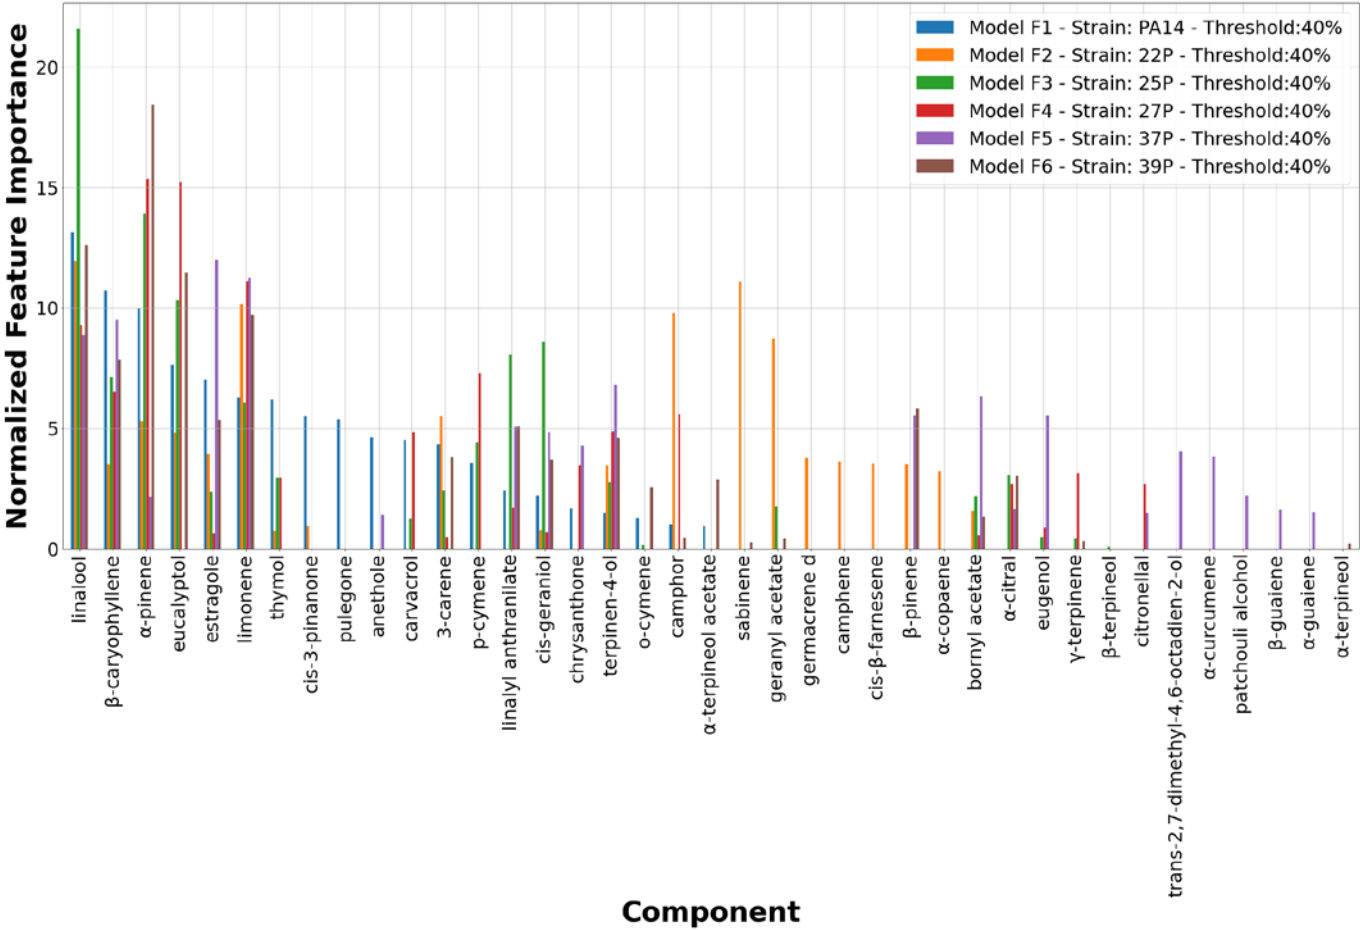

**Figure S13.** Normalized feature importances for the final models F7-F11 developed at threshold value of 120% (see main text Table 1). The top 20 components are displayed.

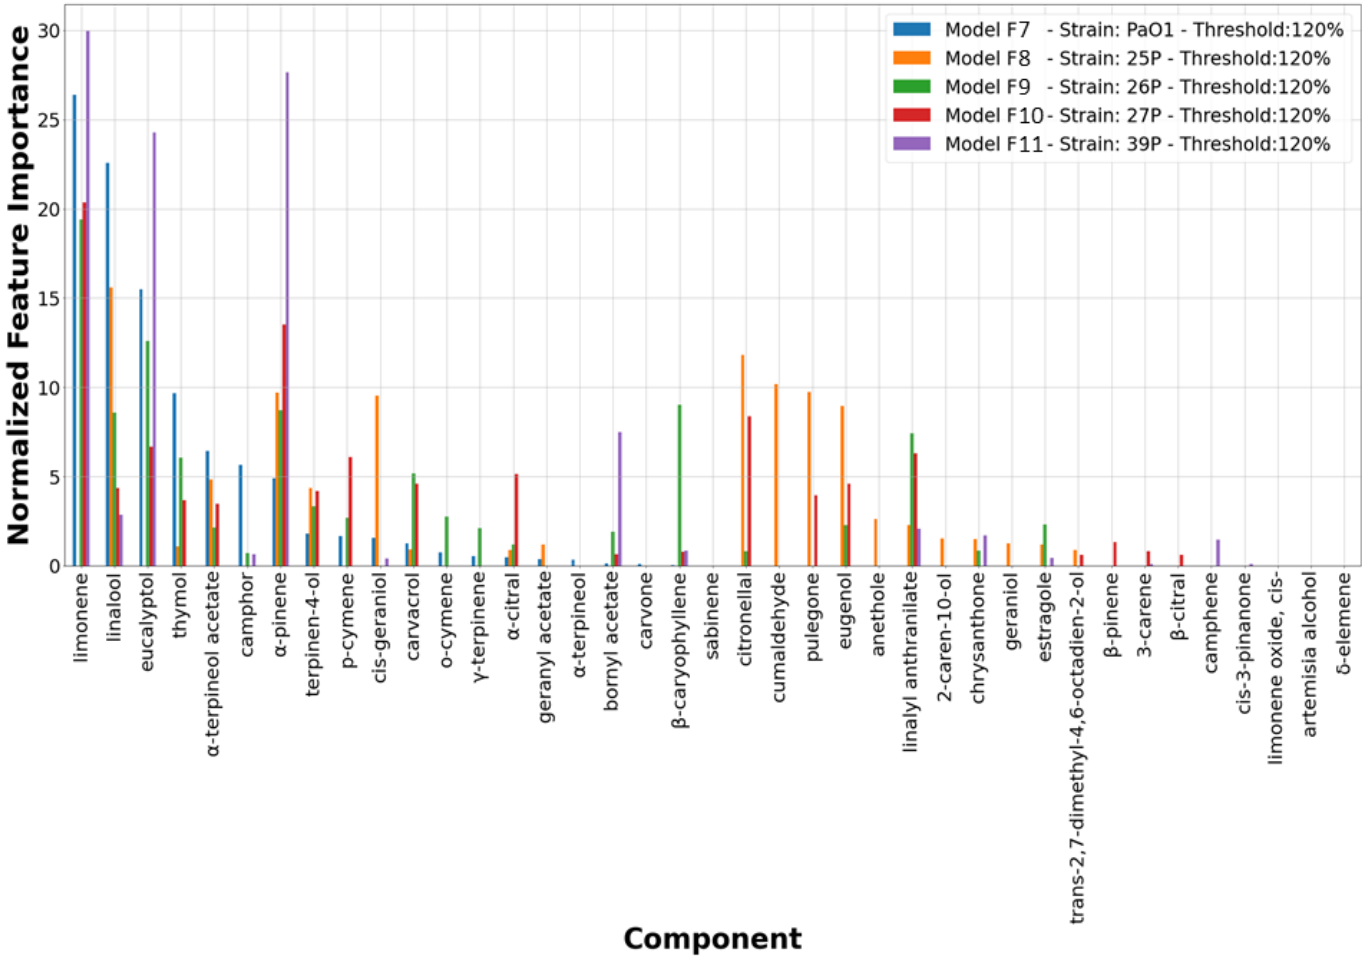

Supplement: s1 [file s1]
